# Supplementary material for: A multiplicity of factors contributes to selective RNA polymerase III occupancy of a subset of RNA polymerase III genes in mouse liver
Source: HighWire-hosted journal article supplement (doi:10.1101/gr.130286.111), 2012-01-27
Supplement: Canella_Bernasconi_FigS1_120111.pdf [file Canella_Bernasconi_FigS1_120111.pdf]

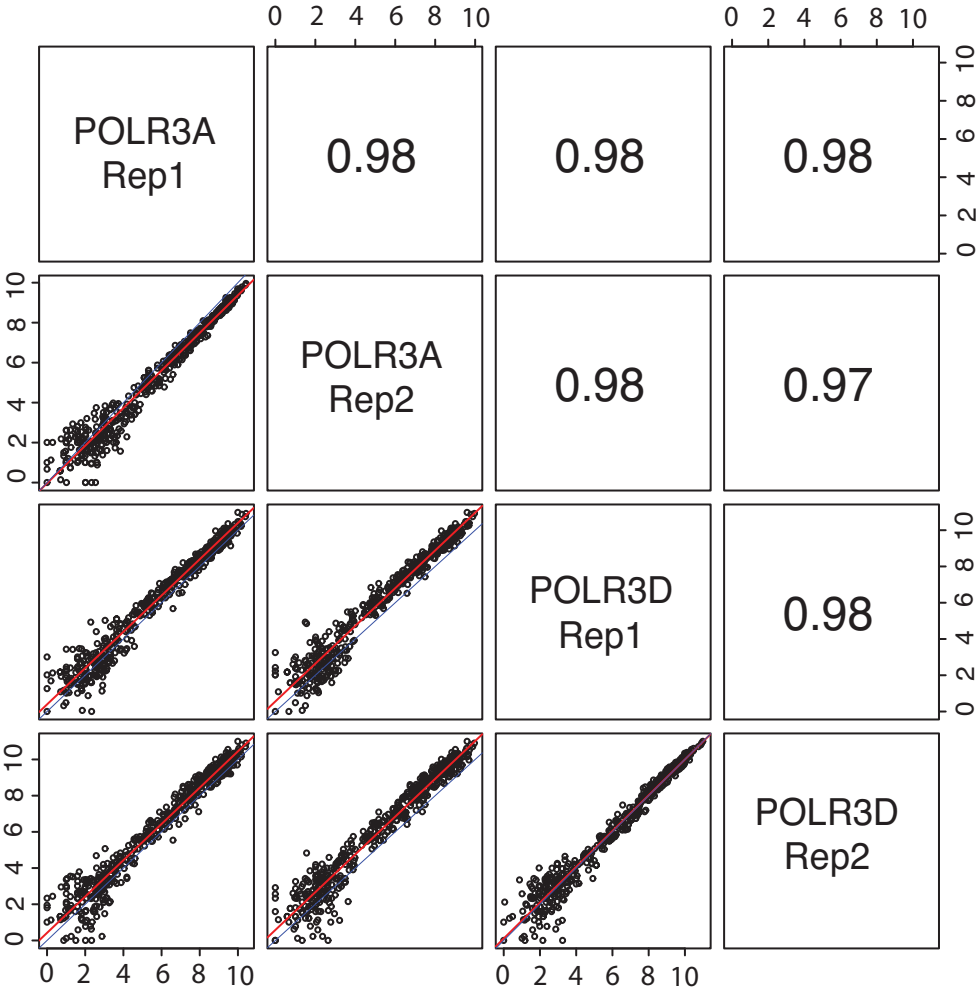

Figure S1. Pearson correlations of log2 scores obtained with the anti-POLR3A and anti-POLR3D antibodies for the Rep1 and Rep2 biological replicates, as indicated. All loci listed in Tables S1-S5 are included. The regression line is indicated in red, the y=x line in blue. The Pearson correlation coefficients are indicated in the squares in the upper right part of the figure.
