# Supplementary material for: A multiplicity of factors contributes to selective RNA polymerase III occupancy of a subset of RNA polymerase III genes in mouse liver
Source: HighWire-hosted journal article supplement (doi:10.1101/gr.130286.111), 2012-01-27
Supplement: Canella_Bernasconi_FigS2_120111.docx [file Canella_Bernasconi_FigS2_120111.docx]

Box D

************ * ** **** ********** ********** **** *** ******* ********** ******* *** *** ********

**22 chr8-126099726-126100344** CGAGCGAGAG CGCAGCA**GGC TCTTGGGGC**T TGTCGGCGCC GCCCGCCCTC GTCTACGGCC ATACCACCCT GAACGCGCCC GATCTCGTCT GATCTCGGA**A** +50

**38** **chr8-126126897-126127515** CGAGCGAGAG CGCAGCAGGC TCTTGGGGCT TGTCGGCGCC GCCCGCCCTC GTCTACGGCC ATACCACCCT GAACGCGCCC GATCTCGTCT GATCTCGGAA +50

**5** **chr8-126069228-126069846** CGAGCGAGAG CGCAGCAGGC TCTTGGGGCT TGTCGGCGCC GCCCGCCCTC GTCTACGGCC ATACCACCCT GAACGCGCCC GATCTCGTCT GATCTCGGAA +50

**41** **chr8-126131970-126132588** CGAGCGAGAG CGCAGCAGGC TCTTGGGGCT TGTCGGCGCC GCCCGCCCTC GTCTACGGCC ATACCACCCT GAACGCGCCC GATCTCGTCT GATCTCGGAA +50

**39** **chr8-126128598-126129216** CGAGCGAGAG CGCAGCAGGC TCTTGGGGCT TGTCGGCGCC GCCCGCCCTC GTCTACGGCC ATACCACCCT GAACGCGCCC GATCTCGTCT GATCTCGGAA +50

**34** **chr8-126120107-126120725** CGAGCGAGAG CGCAGCAGGC TCTTGGGGCT TGTCGGCGCC GCCCGCCCTC GTCTACGGCC ATACCACCCT GAACGCGCCC GATCTCGTCT GATCTCGGAA +50

**13** **chr8-126084538-126085156** CGAGCGAGAG CGCAGCAGGC TCTTGGGGCT TGTCGGCGCC GCCCGCCCTC GTCTACGGCC ATACCACCCT GAACGCGCCC GATCTCGTCT GATCTCGGAA +50

**9** **chr8-126076014-126076632** CGAGCGAGAG CGCAGCAGGC TCTTGGGGCT TGTCGGCGCC GCCCGCCCTC GTCTACGGCC ATACCACCCT GAACGCGCCC GATCTCGTCT GATCTCGGAA +50

**8** **chr8-126074317-126074935** CGAGCGAGAG CGCAGCAGGC TCTTGGGGCT TGTCGGCGCC GCCCGCCCTC GTCTACGGCC ATACCACCCT GAACGCGCCC GATCTCGTCT GATCTCGGAA +50

**46** **chr8-126140460-126141078** CGAGCGAGAG CGCAGCAGGC TCTTGGGGCT TGTCGGCGCC GCCCGCCCTC GTCTACGGCC ATACCACCCT GAACGCGCCC GATCTCGTCT GATCTCGGAA +50

**49** **chr8-126145578-126146196** CGAGCGAGAG CGCAGCAGGC TCTTGGGGCT TGTCGGCGCC GCCCGCCCTC GTCTACGGCC ATACCACCCT GAACGCGCCC GATCTCGTCT GATCTCGGAA +50

**42** **chr8-126133667-126134285** CGAGCGAGAG CGCAGCAGGC TCTTGGGGCT TGTCGGCGCC GCCCGCCCTC GTCTACGGCC ATACCACCCT GAACGCGCCC GATCTCGTCT GATCTCGGAA +50

**4** **chr8-126067523-126068141** CGAGCGAGAG C**C**CAGCAGGC TCTTGGGGCT TGTCGGCGCC GCCCGCCCTC GTCTACGGCC ATACCACCCT GAACGCGCCC GATCTCGTCT GATCTCGGAA +50

**35** **chr8-126121805-126122426** CGAGCGAGAG C**C**CAG**A**AGGC TCTTGGGGCT TGTCGGCGCC GCCCGCCCTC GTCTACGGCC ATACCACCCT GAACGCGCCC GATCTCGTCT GATCTCGGAA +50

**17** **chr8-126091287-126091905** CGAGCGAGAG C**C**CAGCAGGC TCTTGGGGCT TGTCGGCGCC GCCCGCCCTC GTCTACGGCC ATACCACCCT GAACGCGCCC GATCTCGTCT GATCTCGGAA +50

**43** **chr8-126135365-126135983** CGAGCGAGAG C**C**CAGCAGGC TCTTGGGGCT TGTCGGCGCC GCCCGCCCTC GTCTACGGCC ATACCACCCT GAACGCGCCC GATCTCGTCT GATCTCGGAA +50

**26** **chr8-126106497-126107118** CGAGCGAGAG CGCAGCAGGC TCTTGGGGCT TGTCGGCGCC GCCCG**A**CCTC GTCTACGGCC ATACCACCCT GAACGCGCCC GATCTCGTCT GATCTCGGAA +50

**30** **chr8-126113304-126113922** CGAGCGAGAG CGCAGCAGGC TCTTGGGGCT TGTCGGCGCC GCCCGCCCTC GTCTACGGCC ATACCACCCT GAACGCGCCC GATCTCGTCT GATCTCGGAA +50

**7** **chr8-126072606-126073224** CGAGCGAGAG CGCAGCAGGC TCTTGGGGCT TGTCGGCGCC GCCCGCCCTC GTCTACGGCC ATACCACCCT GAACGCGCCC GATCTCGTCT GATCTCGGAA +50

**18** **chr8-126092978-126093596** CGAGCGAGAG CGCAGCAGGC TCTTGGGGCT TGTCGGCGCC GCCCGCCCTC GTCTACGGCC ATACCACCCT GAACGCGCCC GATCTCGTCT GATCTCGGAA +50

**44** **chr8-126137064-126137682** CGAGCGAGAG CGCAGCAGGC TCTTGGGGCT TGTCGGCGCC GCCCGCCCTC GTCTACGGCC ATACCACCCT GAACGCGCCC GATCTCGTCT GATCTCGGAA +50

**36** **chr8-126123511-126124129** CGAGCGAGAG CGCAGCAGGC TCTTGGGGCT TGTCGGCGCC GCCCGCCCTC GTCTACGGCC ATACCACCCT GAACGCGCCC GA**C**CTCGTCT GATCTCGGAA +50

**28** **chr8-126109892-126110510** CGAGCGAGAG C**C**CAGCAGGC TCTTGGGGCT TGTCGGCGCC GCCCGCCCTC GTCTACGGCC ATACCACCCT GAACGCGCCC GATCTCGTCT GATCTCGGAA +50

**12** **chr8-126082851-126083469** CGAGCGAGAG CGCAGCAGGC TCTTGGGGCT TGTCGGCGCC GCCCG**A**CCTC GTCTACGGCC ATACCACCCT GAACGCGCCC GATCTCGTCT GAT**T**TCGGAA +50

**20** **chr8-126096360-126096978**  CGAGCGAGAG C**C**CAGCAGGC TCTTGGGGCT TGTCGGCGCC GCCCGCCCTC GTCTACGGCC ATACCACCCT GAACGCGCCC GATCTCGTCT GAT**T**TCGGAA +50

**15** **chr8-126087936-126088554** CGAGCGAGAG CGCAGCAGGC TCTTGGGGCT TGTCGGCGCC GCCCGCCCTC GT**A**TACGGCC ATACCACCCT GAACGCGCCC GATCTCGTCT GATCTCGGAA +50

**40** **chr8-126130260-126130881** CGAGCGAGAG CGCAGCAGGC TCTTGGGGCT TGTCGGCGCC GCCCGCCCTC GTCTACGGCC ATACCACCCT GAACGCGCCC GATCTCGTCT GATCTCGGAA +50

**6** **chr8-126070915-126071533** CGAGCGAGAG CGCAGCAGGC TCTTGGGGCT TGTCGGCGCC GCCCGCCCTC GTCTACGGCC ATACCACCCT GAACGCGCCC GATCTCGTCT GATCTCGGAA +50

**14** **chr8-126086245-126086863** CGAGCGAGAG CGCAGCAGGC TCTTGGGGCT TGTCGGCGCC GCCC**A**CCCTC **AC**CTACGGCC ATACCACCCT GAACGCGCCC GATCTCGTCT GATCTCGGAA +50

**19** **chr8-126094651-126095269** CGAGCGAGAG CGCAGCAGGC TCTTGGGGCT TGTCGGCGCC GCCC**A**CCCTC **AC**CTACGGCC ATACCACCCT GAACGCGCCC GATCTCGTCT GATCTCGGAA +50

**27** **chr8-126108185-126108803** CGAGCGAGAG CGCAGCAGGC TCTTGGGGCT TGTCGGCGCC GCCC**A**CCCTC **AC**CTACGGCC ATACCACCCT GAACGCGCCC GAT**AAA**GTCT GATCTCGGAA +50

**16** **chr8-126089616-126090237** CGAGCGAGAG CGCAGCAGGC TCTTGGGGCT TGTCGGCGCC GCCC**A**CCCT**T** GTCTACGGCC ATACCACCCT GAACGCGCCC GATCTCGTCT GATCTCGGAA +50

**24** **chr8-126103100-126103718** CGAGCGAGAG CGCAGCAGGC TCTTGGGGCT TGTCGGCGCC GCCC**A**CCCT**T** GTCTACGGCC ATACCACCCT GAACGCGCCC GATCTCGTCT GATCTCGGAA +50

**48** **chr8-126143888-126144509**  CGAGCGAGAG CGCAGCAGGC TCTTGGGGCT TGTCGGCGCC GCCC**A**CCCTC GTCTACGGCC ATACCACCCT GAACGCGCCC GATCTCGTCT GATCTCGGAA +50

**37** **chr8-126125219-126125830** CGAGCGAGAG CGCAGCAGGC TCTTGGGGCT TGTCGGCGCC GCCCGCCCTC GTCTACGGCC ATACCACCCT GAACGCG**---** **-------**TCT GATCTCGGAA +40

**50** **chr8-126147287-126147895** CGAGCGAGAG CGCAGCAGGC TCTTGGGGCT TGTCGGCGCC GCCCGCCCTC GTCTACGGCC ATACCACCCT GAACGCG**---** **-------**TCT GATCTCGGAA +40

**10** **chr8-126079413-126080031** CGAGCGAGAG C**C**CAGCAGGC TCTTGGGGCT TGTCGGCGCC GCCCGCCCTC GTCTACGGCC ATACCACCCT GAACGCGCCC GATCTCGTCT GATCTCGGAA +50

**21** **chr8-126098047-126098665** CGAGCGAGAG C**C**CAGCAGGC TCTTGGGGCT TGTCGGCGCC GCCCGCCCTC GTCTACGGCC ATACCACCCT GAACGCGCCC GATCTCGTCT GATCTCGGAA +50

**33** **chr8-126118404-126119022** CGAGCGAGAG C**C**CAGCAGGC TCTTGGGGCT TGTCGGCGCC GCCCGCCCTC GTCTACGGCC ATACCACCCT GAACGCGCCC GATCTCGTCT GATCTCGGAA +50

**11** **chr8-126081140-126081758** CGAGCGAGAG C**C**CAG**A**AGGC TCTTGGGGCT TGTCGGCGCC GCCCGCCCTC GTCTACGGCC ATACCACCCT GAACGCGCCC GATCTCGTCT GATCTCGGAA +50

**23** **chr8-126101405-126102023** CGAGCGAGAG C**C**CAG**A**AGGC TCTTGGGGCT TGTCGGCGCC GCCCGCCCTC GTCTACGGCC ATACCACCCT GAACGCGCCC GATCTCGTCT GATCTCGGAA +50

**25** **chr8-126104805-126105423** CGAGCGAGAG C**C**CAGCAGGC TCTTGGGGCT TGTCGGCGCC GCCCGCCCTC GTCTACGGCC ATACCACCCT GAACGCGCCC GATCTCGTCT GAT**T**TCGGAA +50

**32** **chr8-126116718-126117339** CGAGCGAGAG C**C**CAGCAGGC TCTTGGGGCT TGTCGGCGCC GCCCGCCCTC GTCTACGGCC ATACCACCCT GAACGCGCCC GATCTCGTCT GATCTCGGAA +50

**45** **chr8-126138746-126139367** CGAGCGAGAG C**C**CAGCAGGC TCTTGGGGCT TGTCGGCGCC GCCCGCCCTC GTCTACGGCC ATACCACCCT GAACGCGCCC GATCTCGTCT GATCTCGGAA +50

**47** **chr8-126142183-126142804** CGAGCGAGAG C**C**CAGCAGGC TCTTGGGGCT TGTCGGCGCC GCCCGCCCTC GTCTACGGCC ATACCACCCT GAACGCGCCC GATCTCGTCT GATCTCGGAA +50

**1** **chr8-126062436-126063054** CGAGCGAGAG CGCAGCAGGC TCTTGGGGCT TGTCGGCGCC GCCC**A**CCCTC GTCTACGGCC ATACCACCCT GAACGCGCCC GATCTCGTCT GATCTCGGAA +50

**2** **chr8-126064143-126064761** CGAGCGAGAG CGCAGCAGGC TCTTGGGGCT TGTCGGCGCC GCCC**A**CCCTC G**C**CTACGGCC ATACCACCCT GAACGCGCCC GATCTCGTCT GATCTCGGAA +50

**29** **chr8-126111609-126112227** CGAGCGAGAG CGCA**A**CAGGC TCTTGGGGCT TGTCGGCGCC GCCC**A**CCCTC G**C**CTACGGCC ATACCACCCT GAACGCGCCC GATCTCGTCT GATCTCGGAA +50

**31** **chr8-126115021-126115639** CGAGCGAGAG CGCAGCAGGC TCTTGGGGCT TGTCGGCGCC GCCC**A**CCCTC **AC**CTACGGCC ATACCACCCT GAACGCGCCC GATCTCGTCT GATCTCGGAA +50

**3** **chr8-126065828-126066446** CGAGCGAGAG CGCAGCAGGC TCTTGGGGCT TGTCGGCGCC GCCCGCCCTC GTCTACGGCC ATACCACCCT GAACGCGCCC GATCTCGTCT GATCTCGGAA +50

**-50........-40........-30........-20........-10........+1.........+11........+21........+31........+41........** Box A IE Box C

************ * ******** ********** ***** ** ** ******* ********** ********** ********** ********** ********** *******

**22** **chr8-126099726-126100344** **GCTAAGCAGG GTCG**GG**CCTG GT**TAGTACT**T GGATGGGAGA** CCGCCTGGGA ATACCGGGTG CTGTAGGCTT TTTGGACTCC CCTCTGTCTC TCTCTCCCTT TTGGC +155

**38** **chr8-126126897-126127515** GCTAAGCAGG GTCGGGCCTG GTTAGTACTT GGATGGGAGA CCGCCTGGGA ATACCGGGTG CTGTAGGCTT TTTGGACTCC CCTCTGTCTC TCTCTCCCTT TTGGC +155

**5** **chr8-126069228-126069846** GCTAAGCAGG GTCGGGCCTG GTTAGTACTT GGATGGGAGA CCGCCTGGGA ATACCGGGTG CTGTAGGCTT TTTGGACTCC CCTCTGTCTC TCTCTCCCTT TTGGC +155

**41** **chr8-126131970-126132588** GCTAAGCAGG GTCGGGCCTG GTTAGTACTT GGATGGGAGA CCGCCTGGGA ATACCGGGTG CTGTAGGCTT TTTGGACTCC CCTCTGTCTC TCTCTCCCTT TTGGC +155

**39** **chr8-126128598-126129216** GCTAAGCAGG GTCGGGCCTG GTTAGTACTT GGATGGGAGA CCGCCTGGGA ATACCGGGTG CTGTAGGCTT TTTGGACTCC CCTCTGTCTC TCTCTCCCTT TTGGC +155

**34** **chr8-126120107-126120725** GCTAAGCAGG GTCGGGCCTG GTTAGTACTT GGATGGGAGA CCGCCTGGGA ATACCGGGTG CTGTAGGCTT TTTGGACTCC CCTCTGTCTC TCTCTCCCTT TTGGC +155

**13** **chr8-126084538-126085156** GCTAAGCAGG GTCGGGCCTG GTTAGTACTT GGATGGGAGA CCGCCTGGGA ATACCGGGTG CTGTAGGCTT TTTGGACTCC CCTCTGTCTC TCTCTCCCTT TTGGC +155

**9** **chr8-126076014-126076632** GCTAAGCAGG GTCGGGCCTG GTTAGTACTT GGATGGGAGA CCGCCTGGGA ATACCGGGTG CTGTAGGCTT TTTGGACTCC CCTCTGTCTC TCTCTCCCTT TTGGC +155

**8** **chr8-126074317-126074935** GCTAAGCAGG GTCGGGCCTG GTTAGTACTT GGATGGGAGA CCGCCTGGGA ATACCGGGTG CTGTAGGCTT TTTGGACTCC CCTCTGTCTC TCTCTCCCTT TTGGC +155

**46** **chr8-126140460-126141078** GCTAAGCAGG GTCGGGCCTG GTTAGTACTT GGATGGGAGA CCGCCTGGGA ATACCGGGTG CTGTAGGCTT TTTGGACTCC CCTCTGTCTC TCTCTCCCTT TTGGC +155

**49** **chr8-126145578-126146196** GCTAAGCAGG GTCGGGCCTG GTTAGTACTT GGATGGGAGA CCGCCTGGGA ATACCGGGTG CTGTAGGCTT TTTGGACTCC CCTCTGTCTC TCTCTCCCTT TTGGC +155

**42** **chr8-126133667-126134285** GCTAAGCAGG GTCGGGCCTG GTTAGTACTT GGATGGGAGA CCGCCTGGGA ATACCGGGTG CTGTAGGCTT TTTGGACTCC CCTCTGTCTC TCTCTCCCTT TTGGC +155

**4** **chr8-126067523-126068141** GCTAAGCAGG GTCGGGCCTG GTTAGTACTT GGATGGGAGA CCGCCTGGGA ATACCGGGTG CTGTAGGCTT TTTGGACTCC CCTCTGTCTC TCTCTCCCTT TTGGC +155

**35** **chr8-126121805-126122426** GCTAAGCAGG GTCGGGCCTG GTTAGTACTT GGATGGGAGA CCGCCTGGGA ATACCGGGTG CTGTAGGCTT TTTGGACTCC CCTCTGTCTC TCTCTCCCTT TTGGC +155

**17** **chr8-126091287-126091905** GCTAAGCAGG GTCGGGCCTG GTTAGTACTT GGATGGGAGA CCGCCTGGGA ATACCGGGTG CTGTAGGCTT TTTGGACTCC CCTCTGTCTC TCTCTCCCTT TTGGC +155

**43** **chr8-126135365-126135983** GCTAAGCAGG GTCGGGCCTG GTTAGTACTT GGATGGGAGA CCGCCTGGGA ATACCGGGTG CTGTAGGCTT TTTGGACTCC CCTCTGTCTC TCTCTCCCTT TTGGC +155

**26** **chr8-126106497-126107118** GCTAAGCAGG G**A**CGGGCCTG GTTAGTACTT GGATGGGAGA CCGCCTGGGA ATACCGGGTG CTGTAGGCTT TTTGGACTCC CCTCTGTCTC TCTCTCCCTT TTGGC +155

**30** **chr8-126113304-126113922** GCTAAGCAGG G**A**CGGGCCTG GTTAGTACTT GGATGGGAGA CCGCCTGGGA ATACCGGGTG CTGTAGGCTT TTTGGACTCC CCTCTGTCTC TCTCTCCCTT TTGGC +155

**7** **chr8-126072606-126073224** GCTAAGCAGG G**A**CGGGCCTG GTTAGTACTT GGATGGGAGA CCGCCTGGGA ATACCGGGTG CTGTAGGCTT TTTGGACTCC CCTCTGTCTC TCTCTCCCTT TTGGC +155

**18** **chr8-126092978-126093596** GCTAAGCAGG G**A**CGGGCCTG GTTAGTACTT GGATGGGAGA CCGCCTGGGA ATACCGGGTG CTGTAGGCTT TTTGGACTCC CCTCTGTCTC TCTCTCCCTT TTGGC +155

**44** **chr8-126137064-126137682** GCTAAGCAGG GTCGGGCCTG GTTAGTACTT GGATGGGAGA CCGCCTGGGA ATACCGGGTG CTGTAGGCTT TTTGGACTCC CCTCTGTCTC TCTCTCCCTT TTGGC +155

**36** **chr8-126123511-126124129** GCTAAGCAGG GTCGGGCCTG GTTAGTACTT GGATGGGAGA CCGCCTGGGA ATACCGGGTG CTGTAGGCTT TTTGGACTCC CCTCTGTCTC TCTCTCCCTT TTGGC +155

**28** **chr8-126109892-126110510** GCTAAGCAGG GTCGGGCCTG GTTAGTACTT GGATGGGAGA CCGCCTGGGA ATACCGGGTG CTGTAGGCTT TTTGGACTCC CCTCTGTCTC TCTCTCCCTT TTGGC +155

**12** **chr8-126082851-126083469** GCTAAGCAGG GTCGGGCCTG GTTAGTACTT GGATGGGAGA CCGCCTGGGA ATACCGGGTG CTGTAGGCTT TTTGGACTCC CCTCTGTCTC TCTCTCCCTT TTGGC +155

**20** **chr8-126096360-126096978** GCTAAGCAGG GTCGGGCCTG GTTAGTACTT GGATGGGAGA CCGCCTGGGA ATACCGGGTG CTGTAGGCTT TTTGGACTCC CCTCTGTCTC TCTCTCCCTT TTGGC +155

**15** **chr8-126087936-126088554** GCTAAGCAGG GTCGGGCCTG GTTAGTACTT GGATG**A**GAGA CCGCCTGGGA ATACCGGGTG CTGTAGGCTT TTTGGACTCC CCTCTGTCTC TCTCTCCCTT TTGGC +155

**40** **chr8-126130260-126130881** GCTAAGCAGG GTCGGGCCTG GTTAGTACTT GGATGGGAGA CCGCCTGGGA ATACCGGGTG CTGTAGGCTT TTTGGACTCC CCTCTGTCTC TCTCTCCCTT TTGGC +155

**6** **chr8-126070915-126071533** GCTAAGCAGG GTCGGGCCTG GTTAGTACTT GGATGGGAGA CCGCCTGGGA ATACCGGGTG CTGTAGGCTT TTTGGACTCC CCTCTGTCTC TCTCTCCCTT TTGGC +155

**14** **chr8-126086245-126086863** GCTAAGCAGG GTCGGGCCTG GTTAGTACTT GGATGGGA**TT** CC**C**CCTGGGA ATACCGGGTG CTGTAGGCTT TTTGGACTCC CCTCTGTCTC TCTCTCCCTT TTGGC +155

**19** **chr8-126094651-126095269** GCTAAGCAGG GTCGGGCCTG GTTAGTACTT GGATGGGA**TT** CC**C**CCTGGGA ATACCGGGTG CTGTAGGCTT TTTGGACTCC CCTCTGTCTC TCTCTCCCTT TTGGC +155

**27** **chr8-126108185-126108803** GCTAAGCAGG GTCGGGCCTG GTTAGTACTT GGATGGGA**TT** CC**C**CCTGGGA ATACCGGGTG CTGTAGGCTT TTTGGACTCC CCTCTGTCTC TCTCTCCCTT TTGGC +155

**16** **chr8-126089616-126090237** GCTAAGCAGG GTCGGGCCTG GTTAGTACTT GGATGGGAGA CCGCCTGGGA ATACCGGGTG CTGTAGGCTT TTTGGACTCC CCTCTGTCTC TCTCTCCCTT TTGGC +155

**24** **chr8-126103100-126103718** GCTAAGCAGG GTCGGGCCTG GTTAGTACTT GGATGGGAGA CCGCCTGGGA ATACCGGGTG CTGTAGGCTT TTTGGACTCC CCTCTGTCTC TCTCTCCCTT TTGGC +155

**48** **chr8-126143888-126144509** GCTAAGCAGG GTCGGGCCTG GTTAGTACTT GGATGGGAGA CCGCCTGGGA ATACCGGGTG CTGTAGGCTT TTTGGACTCC CCTCTGTCTC TCTCTCCCTT TTGGC +155

**37** **chr8-126125219-126125830** GCTAAGCAGG GTCGGGCCTG GTTAGTACTT GGATGGGAGA CCGCCTGGGA ATACCGGGTG CTGTAGGCTT TTTGGACTCC CCTCTGTCTC TCTCTCCCTT TTGGC +145

**50** **chr8-126147287-126147895** GCTAAGCAGG GTCGGGCCTG GTTAGTACTT GGATGGGAGA CCGCCTGGGA ATACCGGGTG CTGTAGGCTT TTTGGACTCC CCTCTGTCTC TCTCTCCCTT TTGGC +145

**10** **chr8-126079413-126080031** GCTAAGCAGG GTCGGGCCTG GTTAGTACTT GGATGGGAGA CCGCCTGGGA ATACCGGGTG CTGTAGGCTT TTTGGACTCC CCTCTGTCTC TCTCTCCCTT TTGGC +155

**21** **chr8-126098047-126098665** GCTAAGCAGG GTCGGGCCTG GTTAGTACTT GGATGGGAGA CCGCCTGGGA ATACCGGGTG CTGTAGGCTT TTTGGACTCC CCTCTGTCTC TCTCTCCCTT TTGGC +155

**33** **chr8-126118404-126119022** GCTAAGCAGG GTCGGGCCTG GTTAGTACTT GGATGGGAGA CCGCCTGGGA ATACCGGGTG CTGTAGGCTT TTTGGACTCC CCTCTGTCTC TCTCTCCCTT TTGGC +155

**11** **chr8-126081140-126081758** GCTAAGCAGG GTCGGGCCTG GTTAGTACTT GGATGGGAGA CCGCCTGGGA ATACCGGGTG CTGTAGGCTT TTTGGACTCC CCTCTGTCTC TCTCTCCCTT TTGGC +155

**23** **chr8-126101405-126102023** GCTAAGCAGG GTCGGGCCTG GTTAGTACTT GGATGGGAGA CCGCCTGGGA ATACCGGGTG CTGTAGGCTT TTTGGACTCC CCTCTGTCTC TCTCTCCCTT TTGGC +155

**25** **chr8-126104805-126105423** GCTAAGCAGG GTCGGGCCTG GTTAGTACTT GGATGGGAGA CCGCCTGGGA ATACCGGGTG CTGTAGGCTT TTTGGACTCC CCTCTGTCTC TCTCTCCCTT TTGGC +155

**32** **chr8-126116718-126117339** GCTAAGCAGG GTCGGGCCTG GTTAGTACTT GGATGGGAGA CCGCCTGGGA ATACCGGGTG CTGTAGGCTT TTTGGACTCC CCTCTGTCTC TCTCTCCCTT TTGGC +155

**45** **chr8-126138746-126139367** GCTAAGCAGG GTCGGGCCTG GTTAGTACTT GGATGGGAGA CCGCCTGGGA ATACCGGGTG CTGTAGGCTT TTTGGACTCC CCTCTGTCTC TCTCTCCCTT TTGGC +155

**47** **chr8-126142183-126142804** GCTAAGCAGG GTCGGGCCTG GTTAGTACTT GGATGGGAGA CCGCCTGGGA ATACCGGGTG CTGTAGGCTT TTTGGACTCC CCTCTGTCTC TCTCTCCCTT TTGGC +155

**1** **chr8-126062436-126063054** GCTAAGCAGG GTCGGGCCTG GTTAGTACTT GGATGGGAGA CCGCCTGGGA ATACCGGGTG CTGTAGGCTT TTTGGACTCC CCTCTGTCTC TCTCTCCCTT TTGGC +155

**2** **chr8-126064143-126064761** GCTAAGCAGG GTCGGGCCTG GTTAGTACTT GGATGGGA**TT** CC**C**CCTGGGA ATACCGGGTG CTGTAGGCTT TTTGGACTCC CCTCTGTCTC TCTCTCCCTT TTGGC +155

**29** **chr8-126111609-126112227** GCTAAGCAGG GTCGGGCCTG GTTAGTACTT GGATGGGA**TT** CC**C**CCTGGGA ATACCGGGTG CTGTAGGCTT TTTGGACTCC CCTCTGTCTC TCTCTCCCTT TTGGC +155

**31** **chr8-126115021-126115639** GCTAAGCAGG GTCGGGCCTG GTTAGTACTT GGATGGGA**TT** CC**C**CCTGGGA ATACCGGGTG CTGTAGGCTT TTTGGACTCC CCTCTGTCTC TCTCTCCCTT TTGGC +155

**3** **chr8-126065828-126066446** GCTAAGCAGG GTCGGGCCTG GTTAGTACTT GGATGGGA**TT** CC**C**CCTGGGA ATACCGGGTG CTGTAGGCTT TTTGGACTCC CCTCTGTCTC TCTCTCCCTT TTGGC +155

**+51........+61........+71........+81........+91........+100.......+110.......+120.......+130.......+140.......+150..**

Figure S2. Alignment of the fifty *Rn5s* genes on chromosome 8. The sequences were aligned with ClustalW2 set on the default parameters. The gene number on the left indicates the ordinal position of the gene within the cluster. Boxes D, A, and C as well as the intermediate element (IE), as defined in ([Nielsen et al. 1993](#_ENREF_37)) and ([Pieler et al. 1987](#_ENREF_42)), are highlighted on top in purple, the *Rn5s* coding sequence (which contains the A, IE, and C boxes) is highlighted in yellow. The eight genes highlighted in blue on the left have the lowest scores (see Table S2): the correlating mutations at positions +1 and +2, or +2, or +3 relative to the TSS are highlighted in blue in the sequence, those in box C are highlighted in green. All other mutations are highlighted in grey.
