# Supplementary material for: A multiplicity of factors contributes to selective RNA polymerase III occupancy of a subset of RNA polymerase III genes in mouse liver
Source: HighWire-hosted journal article supplement (doi:10.1101/gr.130286.111), 2012-01-27
Supplement: Canella_Bernasconi_FigS3_120111.docx [file Canella_Bernasconi_FigS3_120111.docx]

OCTAMER PSE TATA

1 *Rnu6* -224 a**atttgcat** -216 -64 **tcaccctaacttaaaaag** -47 -31 c**ttatata**g -23

2 *Rnu6* -231 a**atttgcat** -223 -67 **tcaccctaactgtaaagt** -50 -31 **tataaatat** -23

3 *Rnu6* -227 a**atttgcat** -219 -64 **tcaccctaagttaaagaa** -47 -31 c**ttatata**g -23

4 *Rnu6* -251 a**atttgcat** -243 -65 **ttactgtatgtgaaaagt** -48 -31 **tttaaata**c -23

5 *Rnu6* -210 c**atttgcat** -202 -65 **tcaccataatctaaaagg** -48 -31 c**ttatata**c -23

6 *Rnu6atac* --------- -65 **tcaccattatctaaaaag** -48 -31 **tttaaatac** -23

7 *Rn7sk* -225 **attttgcat** -217 -66 **tcaccacatgtgtaaagt** -49 -32 c**ttatata**c -24

8 *Rmrp* -224 t**atttgcat** -216 -68 **tctcaccataaccaaaaa** -51 -29 **ataaatta**g -21

9 *Rpph1* - 96 **atgcaaat**t - 88 -65 **tcaccctaaacgaaaaat** -48-32 gcc**ttata**g-24

10 *RnY3* -246 **attttgcat** -238

-177 **atg**t**aaat**a -169 -66 **ccaccatgacttgtaaag** -49-31 **ttatatat**c -23

11 *RnY1* -224 t**atttgca**a -216 -66 **tcaccatgactgaaaagt** -49 -32 **tttaatta**g -24

153 *tRNASeC(e)* -205 **atgcaaat**g -197 -65 **tgaccataagtgaaaaaa** -48 -31 **tttatataa** -23

Figure S3. Alignment of type 3 promoter elements for the known type 3 RNAP-III genes. The numbers on the very left refer to row numbers in Table S3 (1 to 11) and Table S1 (153). The coordinates refer to the first and last nucleotide of the sequence shown relative to the TSS (+1).
