# Supplementary material for: A multiplicity of factors contributes to selective RNA polymerase III occupancy of a subset of RNA polymerase III genes in mouse liver
Source: HighWire-hosted journal article supplement (doi:10.1101/gr.130286.111), 2012-01-27
Supplement: Canella_Bernasconi_FigS4_120111.docx [file Canella_Bernasconi_FigS4_120111.docx]

**8**_128788314-128788820 GAAAAAA-------GAAAAACATCTAGTAGCTTGCATCATCAAAATAA-GTTTCGAGTAC 133

**9**_128793113-128793654 ACAGAGATCCTTCCGCTAAATACCAGTTAGCGTGCGTCACTAAGAAGACGCTTCAATAGA 171

**4**_128710577-128711083 TATAGTCTCCTCGTTGGAGAAAGC-GGTGAT----GTCAT-AGAATA-CATAGCTA-AGT 240

**6**_128749272-128749783 TACAATCTCCTCGTTGGAGAAAGC-GGTGAC----GTCAT-AGAATA-CATAGCTA-AGT 200

**7**_128752856-128753405 ------CTCCTTCATGGGCGGGGCTAGTGAC----GCCAT-GATAGATCATAGCTA-AGT 255

**5**_128713956-128714458 ------CTCCTCCATGGGCGGGGCTAGTGAC----GTCAT-GATAGATCGTAGTTA-AAT 193

**1**_128709939-128710465 ACGAA-AGAT-CAATGGCAATGAC--GTACG----GCCAC--GCCTTG--TAGCTA---C 244

**2**_128748717-128749243 ATGAA-AGTTTCAATAGCAATGAC--GTTCA----GCCAC--GCCTGG--TAGCTA---C 238

**3**_128788872-128789417 AGAAACAGGCTCAGCGGAAGCGCG--GTTGC----GCAAC--GCCTAAC-TTGCTA---C 168

* * *

**8**_128788314-128788820 TCAATTAACTGAGC--CGAAGTTTGCCGGCTCTG-----GTGGCGCAGGCCGGTAGGATT 186

**9**_128793113-128793654 ACGATTT-TCAAGC--TCTCTACCGCCGGTTCTG-----GTGGCGCAGGCCGGTAGGATT 223

**4**_128710577-128711083 AGAATCGGAGCAGCAGCAACGCTCGCCGGTTCTG-----GTGGCGCAGGCCGGTAGGATT 295

**6**_128749272-128749783 AGAATCGTTGCAGCAGCAACGCCTGCCGGTCCTG-----GTGGCGCAGGCCGGTAGGATT 255

**7**_128752856-128753405 ATGTTCGAAACGGCCGCTGTAACTGCCGGTACTG-----GTGGTGCAGGCCGGTAGGATT 310

**5**_128713956-128714458 ATGTTTGAAAGAGCTAGAACAACCGCCGGTACTG-----GTGGCGCAGGCCGGTAGGATT 248

**1**_128709939-128710465 ATGAGCTCGAGAATGTGCCTCCTGGGCGG-GCTGGAGAGATGGCTCAG-CCGTTAAAGGC 302

**2**_128748717-128749243 ATGAGCTCAAGAATGTGCCTCCTGGGCGG-GCTGGAGAGATGGCTCAG-CCGTTAAAGGC 296

**3**_128788872-128789417 TTCAGGGAAAGAATACAGGGCGTCGTCGG-GCTGGAGAGATGGCTCAG-CCGTTAAAGGC 226

* *** *** *** *** *** **

**8**_128788314-128788820 T--GCTGAAGGAGGCAGAGGCAGGAGGATCTGGAGTTCGAGG---ACAGCCTGGTCTACA 241

**9**_128793113-128793654 T--GCTGAAGGAGGCAGAGGCAGGAGGATCTGGAGTTCGAGG---ACAGCCTGGTCTACA 278

**4**_128710577-128711083 T--GCTGAAGGAGGCAGAGGCAGGAGGATCTGGAGTTCGAGG---ACAGCCTGGTCTACA 350

**6**_128749272-128749783 T--GCTGAAGGAGGCAGAGGCAGAAGGATCTGGAGTTCGAGG---ACAGCCTGGTCTACA 310

**7**_128752856-128753405 T--GCTGAAGGAGGCAGAGGCAGGAGGATCTGGAGTTCGAGG---ACAGCCTGGTCTACA 365

**5**_128713956-128714458 T--GCTGAAGGAGGCAGAGGCAGGAGGATCTGGAGTTCGAGG---ACAGCCTGGTCTACA 303

**1**_128709939-128710465 TAGGCTCA--CAACCAAAAATATAAGAGTTCGGTTCCCAGCACCCACGGCTGTCTCTCCA 360

**2**_128748717-128749243 TAGGCTCA--CAACCAAAAATATAAGAGTTCGGTTCCCAGCACCCACGGCTGTCTCTCCA 354

**3**_128788872-128789417 TAGGCTCA--CAACCAAAAATATAAGAGTTCGGTTCCCAGCACCCACGGCTGTCTCTCCA 284

* *** * * ** * * ** * ** * ** ** *** **

**8**_128788314-128788820 --CATTTTTTTTTCCTCCCAGTTTCAACAAAACCACAAATCCACGGCTCCACTGCGCCCC 299

**9**_128793113-128793654 --CGCTTTTTTTCTCTCCCATTTTCAACAAAACCACAAATCCACGGTTATACTGCGCCCC 336

**4**_128710577-128711083 --CA--TTTTTTTTCTTT-----------AATTCCTAA-------------TTTTCTCCT 382

**6**_128749272-128749783 --CACTTTTTTTTTCTTT-----------AATTCCCAG-------------TTTTCTCCT 344

**7**_128752856-128753405 --CATTTTTTTTT-CTCGC-----CAAGAAAAGACCAG-------------CTACCGAAT 404

**5**_128713956-128714458 --CATTTTTTTTTTCTCGC-----CAAGAAAAGACCAG-------------CTACCGAAT 343

**1**_128709939-128710465 GCCACCTTTTTTGCCTTAT------ATCACACACACA----------CCGAGTGAGCATG 404

**2**_128748717-128749243 GCCACCTTTTTTGCCTTAT------ACCACACACACAAA-ACACACTCCGAGTGAGCGCG 407

**3**_128788872-128789417 GCCACCTTTTTTGTCGGAC------ACCGCACCCACACACACAGACTACTAATATAGATA 338

* ****** * * * *

Figure S4. Alignment of *Rn4.5S* sequences. The sequences were aligned with Clustal W2 set on the default parameters. The first number on the left in bold indicates the row number of the corresponding entry in Table S4. This number is followed by the chromosome 6 coordinates of the sequence used in the alignment. Only part of the alignment is shown, and the numbers on the right indicate the position relative to the fragments defined by the coordinates on the left. Sequences numbered 1, 2, and 3 on the left correspond to 4.5S genes 1’, 1, and 2 in Gogolevskaya and Kramerov (2010). The other sequences correspond to sequences annotated as 4.5S in the UCSC RNA table. The RNA coding sequence as defined by Gogolevskaya and Kramerov (2010) for sequences 1, 2, and 3 is indicated in yellow, sequences with similarities to A and B boxes in purple. Putative corresponding RNA coding sequence and A and B boxes are similarly indicated for sequences 4-9. The underlined sequences in sequences 1, 2, and 3 correspond to the conserved GCC/AACGCCT and AGAAT elements.
