# Supplementary material for: A multiplicity of factors contributes to selective RNA polymerase III occupancy of a subset of RNA polymerase III genes in mouse liver
Source: HighWire-hosted journal article supplement (doi:10.1101/gr.130286.111), 2012-01-27
Supplement: Canella_Bernasconi_FigS5_120111.docx [file Canella_Bernasconi_FigS5_120111.docx]

# A box

Best pattern

| 1 | 2 | 3 | 4 | 5 | 6 | 7 | 8 | 9 | 10 | 11 | 12 | 13 | 14 | 15 |
| --- | --- | --- | --- | --- | --- | --- | --- | --- | --- | --- | --- | --- | --- | --- |
| * | (a) | * | * | CA | GT | * | * | (g) | * | * | * | (a) | (g) | G |

Highest score pattern: chr11_1821_tRNASer_GCT-

| 1 | 2 | 3 | 4 | 5 | 6 | 7 | 8 | 9 | 10 | 11 | 12 | 13 | 14 | 15 |
| --- | --- | --- | --- | --- | --- | --- | --- | --- | --- | --- | --- | --- | --- | --- |
| T | G | G | C | C | G | A | G | T | G | G | T | T | A | A |

Most common nt

| 1 | 2 | 3 | 4 | 5 | 6 | 7 | 8 | 9 | 10 | 11 | 12 | 13 | 14 | 15 |
| --- | --- | --- | --- | --- | --- | --- | --- | --- | --- | --- | --- | --- | --- | --- |
| T | G | G | C | T | C | A | G | T | G | G | T | T | A | A/G |

**B Box**

Best pattern

| 1 | 2 | 3 | 4 | 5 | 6 | 7 | 8 | 9 | 10 | 11 | 12 | 13 | 14 | 15 |
| --- | --- | --- | --- | --- | --- | --- | --- | --- | --- | --- | --- | --- | --- | --- |
| * | G | * | (t) | * | * | * | * | (t) | (a) | * | * | * | * | * |

Highest score pattern: chr11_1821_tRNASer_GCT-

| 1 | 2 | 3 | 4 | 5 | 6 | 7 | 8 | 9 | 10 | 11 | 12 | 13 | 14 | 15 |
| --- | --- | --- | --- | --- | --- | --- | --- | --- | --- | --- | --- | --- | --- | --- |
| T | G | G | C | C | G | A | G | T | G | G | T | T | A | A |

Most common nt

| 1 | 2 | 3 | 4 | 5 | 6 | 7 | 8 | 9 | 10 | 11 | 12 | 13 | 14 | 15 |
| --- | --- | --- | --- | --- | --- | --- | --- | --- | --- | --- | --- | --- | --- | --- |
| C | C | C | G | G | G | T | T | C | G | A | A | T | C | C |

Figure S5. Results of univariate regression. The best pattern, highest score pattern, and most common nucleotides (nt) are indicated for the A and B boxes. The significance threshold was set at 1%. Positions for which no base was significant in the regression (in general because the bases at these positions did not vary between low and high scoring tRNA genes) are labeled with an asterisk. Nucleotides that correlated with increased score are indicated in upper case, and nucleotides that correlated with decreased score are indicated in lower case in parenthesis.
