# Supplementary material for: A multiplicity of factors contributes to selective RNA polymerase III occupancy of a subset of RNA polymerase III genes in mouse liver
Source: HighWire-hosted journal article supplement (doi:10.1101/gr.130286.111), 2012-01-27
Supplement: Canella_Bernasconi_FigS6_120111.pdf [file Canella_Bernasconi_FigS6_120111.pdf]

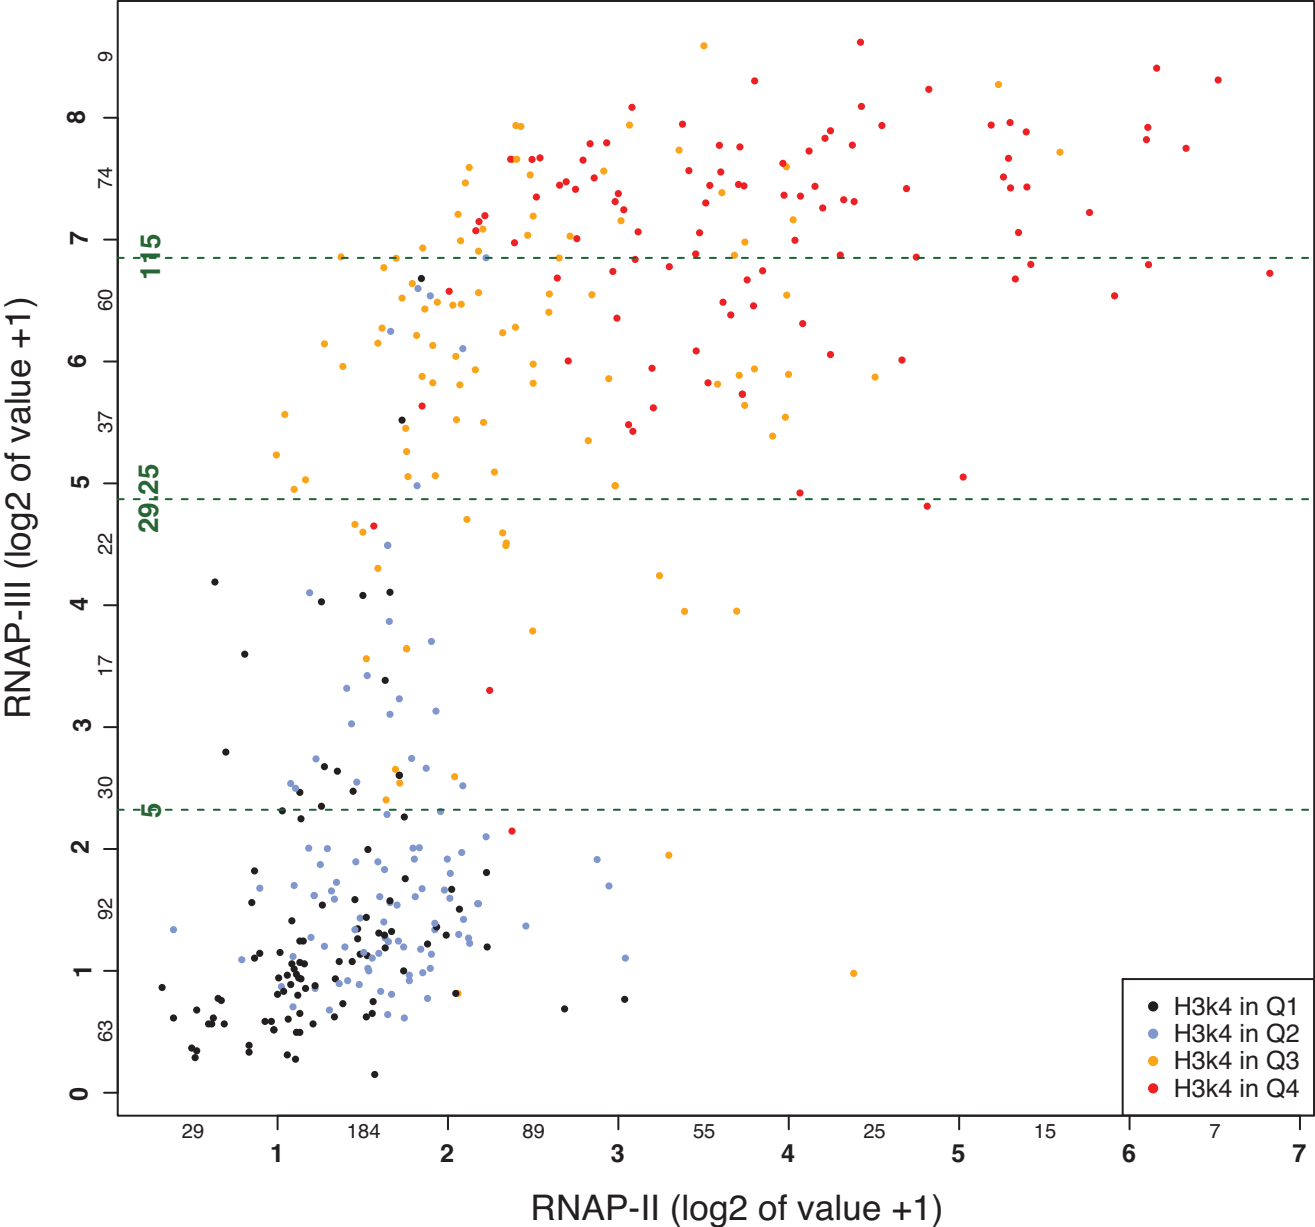

Figure S6. The X and Y axis show RNAP-II and RNAP-III scores (log2 of value+1). The numbers along the axis indicate the number of points counted in vertical respectively horizontal slices of 1 unit starting at 0. The colors of the dots indicate amounts of H3K4me3 tags at the gene, as indicate in the lower right corner.
