# Supplementary material for: A multiplicity of factors contributes to selective RNA polymerase III occupancy of a subset of RNA polymerase III genes in mouse liver
Source: HighWire-hosted journal article supplement (doi:10.1101/gr.130286.111), 2012-01-27
Supplement: Canella_Bernasconi_FigS7_120111.pdf [file Canella_Bernasconi_FigS7_120111.pdf]

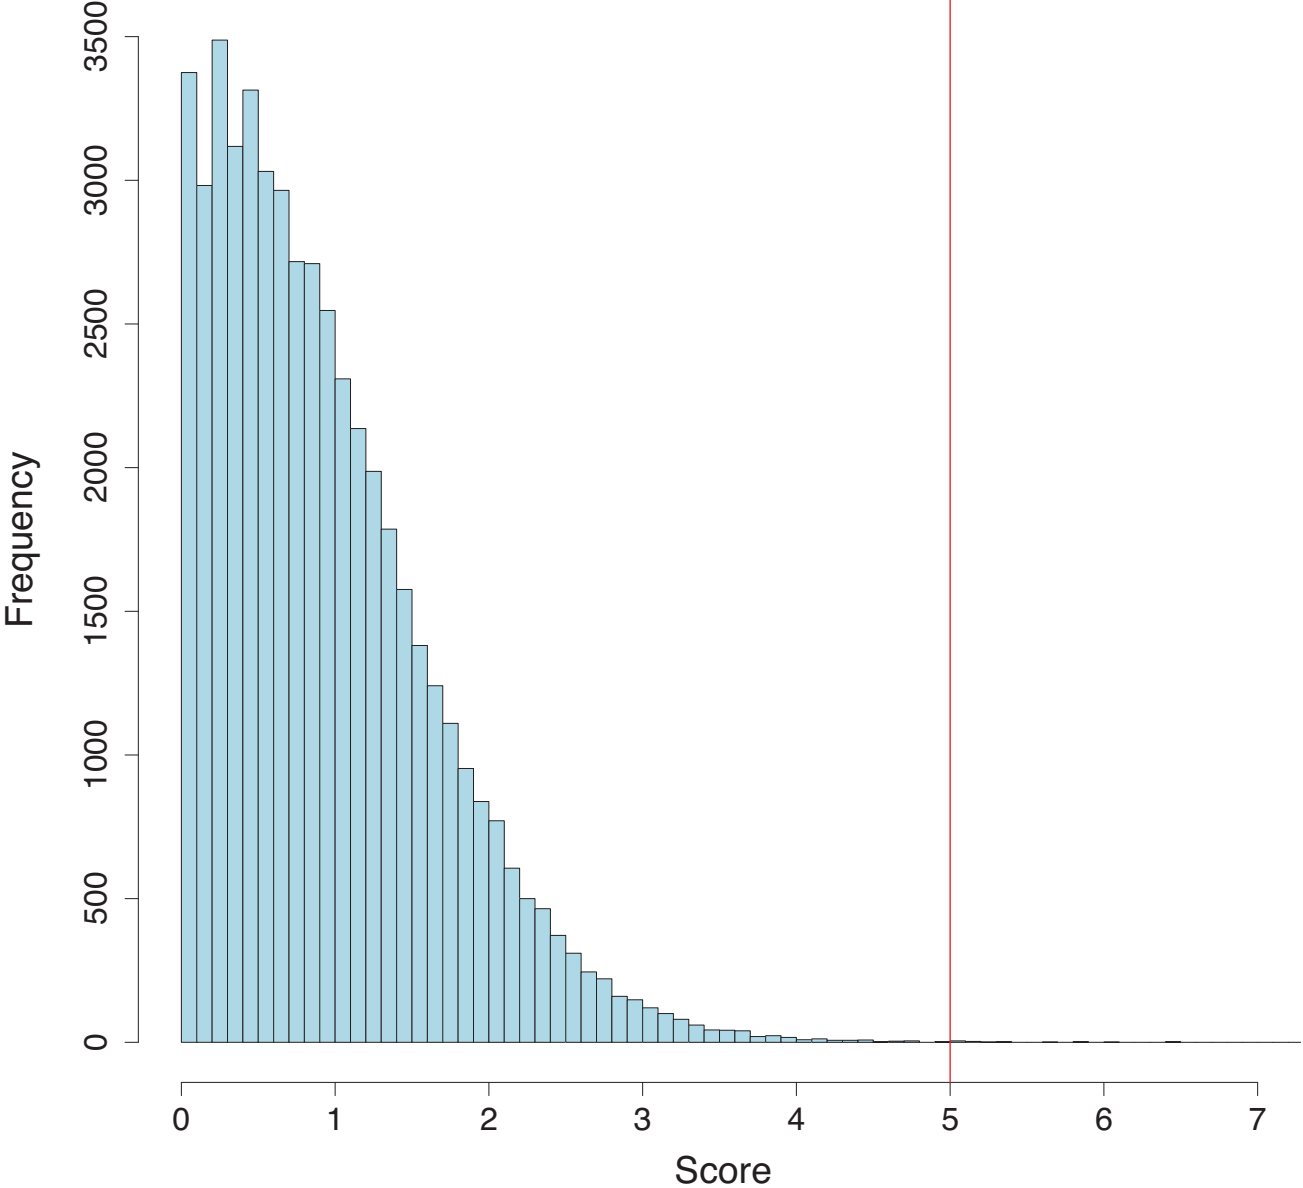

Figure S7. Distribution of scores on 50.000 random regions of the mappable mm9 mouse genome. The X axis indicate scores, the Y axis indicate the number of random regions for a given score (frequency).
