# Supplementary material for: A multiplicity of factors contributes to selective RNA polymerase III occupancy of a subset of RNA polymerase III genes in mouse liver
Source: HighWire-hosted journal article supplement (doi:10.1101/gr.130286.111), 2012-01-27
Supplement: Canella_Bernasconi_Table_S2_120111.xlsx [file Canella_Bernasconi_Table_S2_120111.xlsx]

## Sheet: Sheet1
1	2	3	4	5	6	7	8	9	10	11	12
row #	gene	gene no. on alignment	chr	start	end	link	Average scores for RPC1 and RPC4 in rep1 and rep2
							tags with unique match	tags with multiple matches	total tags	% tags with unique match	Total tag density
1	5S_rRNA (Rn5S)	17	chr8	126091537	126091655	Go2UCSC	0	126.284	126.284	0	30.1393
2	5S_rRNA (Rn5S)	43	chr8	126135615	126135733	Go2UCSC	0	126.284	126.284	0	30.1393
3	5S_rRNA (Rn5S)	4	chr8	126067773	126067891	Go2UCSC	0	126.284	126.284	0	30.1393
4	5S_rRNA (Rn5S)	20	chr8	126096610	126096728	Go2UCSC	0	124.501	124.501	0	29.7137
5	5S_rRNA (Rn5S)	10	chr8	126079663	126079781	Go2UCSC	0	122.558	122.558	0	29.2502
6	5S_rRNA (Rn5S)	33	chr8	126118654	126118772	Go2UCSC	0	122.558	122.558	0	29.2502
7	5S_rRNA (Rn5S)	21	chr8	126098297	126098415	Go2UCSC	0	122.558	122.558	0	29.2502
8	5S_from_RepeatMasker	47	chr8	126142433	126142554	Go2UCSC	0	122.853	122.853	0	29.1121
9	5S_from_RepeatMasker	45	chr8	126138996	126139117	Go2UCSC	0	122.853	122.853	0	29.1121
10	5S_from_RepeatMasker	32	chr8	126116968	126117089	Go2UCSC	0	122.853	122.853	0	29.1121
11	5S_rRNA (Rn5S)	6	chr8	126071165	126071283	Go2UCSC	0	121.684	121.684	0	29.0416
12	5S_from_RepeatMasker	40	chr8	126130510	126130631	Go2UCSC	0	121.964	121.964	0	28.9015
13	5S_rRNA (Rn5S)	25	chr8	126105055	126105173	Go2UCSC	0	120.775	120.775	0	28.8246
14	5S_rRNA (Rn5S)	28	chr8	126110142	126110260	Go2UCSC	0	120.709	120.709	0	28.8088
15	5S_rRNA (Rn5S)	1	chr8	126062686	126062804	Go2UCSC	0	118.434	118.434	0	28.2659
16	5S_rRNA (Rn5S)	34	chr8	126120357	126120475	Go2UCSC	0	117.959	117.959	0	28.1524
17	5S_rRNA (Rn5S)	8	chr8	126074567	126074685	Go2UCSC	0	117.959	117.959	0	28.1524
18	5S_rRNA (Rn5S)	39	chr8	126128848	126128966	Go2UCSC	0	117.959	117.959	0	28.1524
19	5S_rRNA (Rn5S)	13	chr8	126084788	126084906	Go2UCSC	0	117.959	117.959	0	28.1524
20	5S_rRNA (Rn5S)	9	chr8	126076264	126076382	Go2UCSC	0	117.959	117.959	0	28.1524
21	5S_rRNA (Rn5S)	41	chr8	126132220	126132338	Go2UCSC	0	117.959	117.959	0	28.1524
22	5S_rRNA (Rn5S)	38	chr8	126127147	126127265	Go2UCSC	0	117.927	117.927	0	28.1448
23	5S_from_RepeatMasker	48	chr8	126144138	126144259	Go2UCSC	0	118.729	118.729	0	28.1349
24	5S_rRNA (Rn5S)	44	chr8	126137314	126137432	Go2UCSC	0	116.109	116.109	0	27.711
25	5S_from_RepeatMasker	26	chr8	126106747	126106868	Go2UCSC	17.2267	99.553	116.78	0.147514	27.6729
26	5S_rRNA (Rn5S)	42	chr8	126133917	126134035	Go2UCSC	1.01333	114.065	115.079	0.00880557	27.4651
27	5S_rRNA (Rn5S)	46	chr8	126140710	126140828	Go2UCSC	0	112.853	112.853	0	26.934
28	5S_rRNA (Rn5S)	49	chr8	126145828	126145946	Go2UCSC	0.506667	112.077	112.583	0.00450037	26.8695
29	5S_rRNA (Rn5S)	22	chr8	126099976	126100094	Go2UCSC	0	112.003	112.003	0	26.731
30	5S_rRNA (Rn5S)	23	chr8	126101655	126101773	Go2UCSC	0	110.03	110.03	0	26.2601
31	5S_rRNA (Rn5S)	11	chr8	126081390	126081508	Go2UCSC	0	110.03	110.03	0	26.2601
32	5S_rRNA (Rn5S)	30	chr8	126113554	126113672	Go2UCSC	0	109.528	109.528	0	26.1403
33	5S_rRNA (Rn5S)	18	chr8	126093228	126093346	Go2UCSC	0	108.489	108.489	0	25.8923
34	5S_rRNA (Rn5S)	7	chr8	126072856	126072974	Go2UCSC	0	108.489	108.489	0	25.8923
35	5S_rRNA (Rn5S)	12	chr8	126083101	126083219	Go2UCSC	0	106.374	106.374	0	25.3875
36	5S_rRNA (Rn5S)	5	chr8	126069478	126069596	Go2UCSC	0	109.6	109.6	0	24.5716
37	5S_from_RepeatMasker	35	chr8	126122055	126122176	Go2UCSC	10.1333	90.8271	100.96	0.100369	23.9243
38	5S_rRNA (Rn5S)	24	chr8	126103350	126103468	Go2UCSC	0	99.6018	99.6018	0	23.7713
39	5S_rRNA (Rn5S)	50	chr8	126147537	126147645	Go2UCSC	0	93.9142	93.9142	0	22.9619
40	5S_from_RepeatMasker	37	chr8	126125469	126125580	Go2UCSC	0	94.2091	94.2091	0	22.8663
41	5S_rRNA (Rn5S)	36	chr8	126123761	126123879	Go2UCSC	6.33333	76.9409	83.2743	0.0760539	19.8745
42	5S_rRNA (Rn5S)	3	chr8	126066078	126066196	Go2UCSC	0	74.8436	74.8436	0	17.8624
43	5S_from_RepeatMasker	16	chr8	126089866	126089987	Go2UCSC	0	74.577	74.577	0	17.6723
44	5S_rRNA (Rn5S)	14	chr8	126086495	126086613	Go2UCSC	0	50.1788	50.1788	0	11.9758
45	5S_rRNA (Rn5S)	19	chr8	126094901	126095019	Go2UCSC	0	50.1788	50.1788	0	11.9758
46	5S_rRNA (Rn5S)	2	chr8	126064393	126064511	Go2UCSC	1.52	46.2865	47.8065	0.0317948	11.4097
47	5S_rRNA (Rn5S)	31	chr8	126115271	126115389	Go2UCSC	0	46.2645	46.2645	0	11.0416
48	5S_rRNA (Rn5S)	27	chr8	126108435	126108553	Go2UCSC	0	42.0251	42.0251	0	10.0299
49	5S_rRNA (Rn5S)	29	chr8	126111859	126111977	Go2UCSC	0	41.0667	41.0667	0	8.37637
50	5S_rRNA (Rn5S)	15	chr8	126088186	126088304	Go2UCSC	0	36.8948	36.8948	0	8.10619
Table S2. The Rn5S genes that produced convincing peaks are listed together with the corresponding gene number in the Clustal alignment shown in Figure S2, their chromosomal location, a link to the UCSC genome browser, and the tag scores for the anti-POLR3A and anti-POLR3D immunoprecipitations as indicated on top of the columns. The genes indicated in green in column 2 have mutations within box C…
