# Supplementary material for: A multiplicity of factors contributes to selective RNA polymerase III occupancy of a subset of RNA polymerase III genes in mouse liver
Source: HighWire-hosted journal article supplement (doi:10.1101/gr.130286.111), 2012-01-27
Supplement: Canella_Bernasconi_Table_S3_120111.xlsx [file Canella_Bernasconi_Table_S3_120111.xlsx]

## Sheet: Sheet1
1	2	3	4	5	6	7	8	9	10	11	12	13	14	15	16	17	18	19	20	21	22
row no	gene		chr	start	end	link	Average scores for POLR3A and POLR3D in rep1 and rep2					scores POLR3A rep1	score POLR3A rep2	scores POR3D rep1	score POLR3D rep2	scores POLR3A rep1	score POLR3A rep2	scores POR3D rep1	score POLR3D rep2	human syntenic gene	coordinates for human gene
	UCSC browser	MGI(*)					tags with unique match	tags with multiple matches	total tags	% tags with unique match	Total tag density	tags with unique match				tags with multiple matches
1	U6|+	Rnu6	chr12	53704775	53704881	Go2UCSC	326.033	7.07245	333.106	0.978768	81.8442	380.52	234.453	342.72	346.44	6.02176	6.36292	7.28011	8.625	U6-7	chr14:31741001-31741107
2	U6|+ (Das et al. 1988)	Rnu6	chr10	79371940	79372046	Go2UCSC	211.053	7.74644	218.8	0.964596	53.7592	175.68	154.253	242.587	271.693	5.87541	6.33127	8.92682	9.85227	U6-9	chr19:844484-844590
3	U6|-	Rnu6	chr12	53705477	53705578	Go2UCSC	184.68	7.07245	191.752	0.963117	47.6996	175.973	131.44	198.6	232.707	6.02176	6.36292	7.28011	8.625	U6-8	chr14:31742121-31742226
4	U6|+	Rnu6	chr10	79448251	79448357	Go2UCSC	43.64	6.62144	50.2614	0.86826	12.3492	37.5733	34.2667	48.2933	54.4267	4.37541	5.33127	7.92682	8.85227	U6-2	chr19:972521-972627
5	U6|+	Rnu6	chr9	62981090	62981196	Go2UCSC	37.2667	3.53763	40.8043	0.913303	10.0256	29.48	21.24	50.92	47.4267	3.17533	2.28078	4.19797	4.49643	U6-1	chr15:65919330-65919437
6	U6atac|-	Rnu6atac	chr2	27395325	27395450	Go2UCSC	773.737	0	773.737	1	181.628	553.467	427.64	990.867	1122.97	0	0	0	0	RNU6ATAC	chr9:136019382-136019507
7	7SK|-	Rn7sk	chr9	78023110	78023440	Go2UCSC	575.027	179.911	754.938	0.761688	119.641	504.053	411.68	668.147	716.227	146.264	148.863	217.033	207.483	7SK_RNA	chr6:52968377-52968708
8	RNase_MRP|-	Rmrp	chr4	43505660	43505930	Go2UCSC	704	1.27815	705.278	0.998188	123.516	703.267	454.373	896.96	761.4	1.15104	0.805221	1.39541	1.76095	RNaseMRP_RNA	chr9:35647750-35648014
9	Rnase P RNA|-	Rpph1	chr14	51427123	51427447	Go2UCSC	89.6233	0	89.6233	1	14.3397	66.92	66.6133	126.813	98.1467	0	0	0	0	RNaseP_RNA	chr14:19881071-19881410
10	Y3_RNA|+	Rny3	chr6	47731623	47731724	Go2UCSC	314.95	0	314.95	1	78.3458	234.027	192.88	366.987	465.907	0	0	0	0	hY3_RNA	chr7:148311780-148311880
11	Y1_RNA|-	Rny1	chr6	47738068	47738179	Go2UCSC	191.063	0	191.063	1	46.3746	244.8	163.027	218.573	137.853	0	0	0	0	hY1_RNA	chr7:148315162-148315273
12	7SLRNA_srpRNA|+	Rn7sl	chr12	70260298	70260551	Go2UCSC	326.007	377.703	703.709	0.463269	127.023	310.213	283.12	412.173	298.52	353.16	326.991	419.333	411.327	SRP_RNA	chr14:49123047-49123346
13	7SLRNA_srpRNA|-	Rn7sl	chr12	70462167	70462478	Go2UCSC	639.463	377.703	1017.17	0.628671	166.204	660.653	496.2	807.547	593.453	353.16	326.991	419.333	411.327	SRP_RNA	chr14:49399018-49399317
14	Vault|+	Vaultrc5	chr18	36961520	36961662	Go2UCSC	786.767	0	786.767	1	177.6	766.173	482.64	898.36	999.893	0	0	0	0	HVG-3	chr5:140085927-140086015
Table S3. Sequences that displayed convincing peaks and correspond to known RNAP-III transcription units in humans or mouse are listed together with their chromosomal location, a link to the UCSC genome browser, and the tag scores for the anti-POLR3A and anti-POLR3D immunoprecipitations as indicated on top of the columns. In the first column, yellow indicates genes with type 3 promoters, orange i…
