# Supplementary material for: A multiplicity of factors contributes to selective RNA polymerase III occupancy of a subset of RNA polymerase III genes in mouse liver
Source: HighWire-hosted journal article supplement (doi:10.1101/gr.130286.111), 2012-01-27
Supplement: Canella_Bernasconi_Table_S4_120111.xlsx [file Canella_Bernasconi_Table_S4_120111.xlsx]

## Sheet: Sheet1
1	2	3	4	5	6	7	8	9	10	11	12	13	14	15	16	17	18	19
row no	gene	chr	start	end	link	Average scores for POLR3A and POLR3D in rep1 and rep2					scores POLR3A rep1	score POLR3A rep2	scores POR3D rep1	score POLR3D rep2	scores POLR3A rep1	score POLR3A rep2	scores POR3D rep1	score POLR3D rep2
						tags with unique match	tags with multiple matches	total tags	% tags with unique match	Total tag density	tags with unique match				tags with multiple matches
1	B4A_SINE_B4- (4.5S no 1')	chr6	128710011	128710362	Go2UCSC	503.987	76.0792	580.066	0.868844	108.83	602.027	373.013	537.88	503.027	69.2833	59.6833	88.25	87.1
2	B4A_SINE_B4- (4.5S no 1)	chr6	128748852	128749049	Go2UCSC	386.95	76.1575	463.108	0.835551	98.116	414.64	283.987	458.427	390.747	69.33	59.7633	88.37	87.1667
3	B4A_SINE_B4+ (4.5S no 2)	chr6	128788924	128789196	Go2UCSC	498.413	39.2042	537.617	0.927078	93.825	456.32	309.24	577.373	650.72	34.7833	29.6833	47.25	45.1
4	4.5SRNA_scRNA- (Rn4.5s)	chr6	128710426	128710880	Go2UCSC	598.75	42.6442	641.394	0.933513	100.69	628.6	463.547	646.213	656.64	40.59	35.5833	46.75	47.6533
5	4.5SRNA_scRNA- (Rn4.5s)	chr6	128713887	128714556	Go2UCSC	798.03	26.4792	824.509	0.967885	85.0009	627.56	463.547	971.253	1129.76	24.5833	22.4167	27.25	31.6667
6	4.5SRNA_scRNA- (Rn4.5s)	chr6	128749299	128749659	Go2UCSC	992.12	5.02	997.14	0.994966	156.783	974.267	691.347	1152.4	1150.47	4.27333	4.36667	8.95333	2.48667
7	4.5SRNA_scRNA- (Rn4.5s)	chr6	128753013	128753216	Go2UCSC	831.403	15.9583	847.362	0.981167	168.127	981.587	636.227	897.587	810.213	15.25	13.3333	17.25	18
8	4.5SRNA_scRNA+ (Rn4.5s)	chr6	128788436	128788587	Go2UCSC	585.55	29.9792	615.529	0.951295	136.179	509.947	336.12	682.36	813.773	28.5833	25.4167	30.25	35.6667
9	4.5SRNA_scRNA+ (Rn4.5s)	chr6	128793076	128793430	Go2UCSC	1035.5	23.1875	1058.69	0.978098	161.632	1123.88	754.413	1165.17	1098.55	23	19.25	23	27.5
Table S4. The 4.5S related sequences that produced convincing peaks are listed together with the corresponding gene number (column 1) in the Clustal alignment shown in Figure S3, their chromosomal location, a link to the UCSC genome browser, and the tag scores for the anti-RPC1 and anti-RPC4 immunoprecipitations as indicated on top of the columns. The + or - signs following the gene's names in co…
