# Supplementary material for: A multiplicity of factors contributes to selective RNA polymerase III occupancy of a subset of RNA polymerase III genes in mouse liver
Source: HighWire-hosted journal article supplement (doi:10.1101/gr.130286.111), 2012-01-27
Supplement: Canella_Bernasconi_Table_S5_120111.xlsx [file Canella_Bernasconi_Table_S5_120111.xlsx]

## Sheet: Sheet1
1	2	3	4	5	6	7	8	9	10	11	12	13	14	15	16	17	18	19	20	21
row no	gene	chr	start	end	link	orientation	Average scores for POLR3A and POLR3D in rep1 and rep2					scores POLR3A rep1	score POLR3A rep2	scores POR3D rep1	score POLR3D rep2	scores POLR3A rep1	score POLR3A rep2	scores POR3D rep1	score POLR3D rep2	putative promoter elements
												tags with unique match				tags with multiple matches
1	MIR_SINE_MIR|128062205|128062333	chr7	128'062'206	128'062'333	Go2UCSC	-	595.883	0	595.883	1	139.225	460.573	304.453	762.947	855.56	0	0	0	0	A and B boxes
2	B3_SINE_B2|62866110|62866283	chr10	62866100	62866281	Go2UCSC	+	242.053	0	242.053	1	50.2185	168.013	131.907	275.667	392.627	0	0	0	0	A and B boxes
3	B3_SINE_B2|74967323|74967525	chr10	74967299	74967451	Go2UCSC	+	188.43	0	188.43	1	41.596	131.68	112.88	211.707	297.453	0	0	0	0	A and B boxes
4	B2_Mm2_SINE_B2|115002197|115002386	chr5	115002158	115002423	Go2UCSC	-	200.543	0	200.543	1	35.4317	139.213	113.347	207.4	342.213	0	0	0	0	A and B boxes
5	B1_Mus1_SINE_Alu|84746503|84746603	chr16	84746464	84746699	Go2UCSC	+	179.23	0.0774223	179.307	0.999568	33.4529	103.787	116.053	226.907	270.173	0.0183305	0.0122699	0.0365124	0.242577	B box
6	B3A_SINE_B2|86493973|86494154	chr12	86493988	86494179	Go2UCSC	-	140.79	0	140.79	1	28.6159	120.533	69.4267	174.707	198.493	0	0	0	0	A and B boxes
7	B2_Mm1a_SINE_B2|4820961|4821145	chr19	4820900	4821061	Go2UCSC	+	97.27	0	97.27	1	21.0541	119.52	95.28	90.28	84	0	0	0	0	A and B boxes
8	B2_Mm2_SINE_B2|14842700|14842883	chr8	14842649	14843098	Go2UCSC	+	150.28	4.39333	154.673	0.971596	20.6231	141.32	91.2533	165.96	202.587	4.0625	4.5	4.34056	4.67028	A and B boxes
9	B3_SINE_B2|126508176|126508378	chr10	126508214	126508433	Go2UCSC	-	92.5967	0	92.5967	1	17.8071	91.1067	62.5467	101.667	115.067	0	0	0	0	A and B boxes
10	B1_Mus1_SINE_Alu|127986065|127986198	chr7	127986097	127986293	Go2UCSC	-	75.0133	0	75.0133	1	15.0932	83.9333	51.68	86.3467	78.0933	0	0	0	0	B box
11	B1_Mus1_SINE_Alu|117336681|117336825	chr7	117336693	117336856	Go2UCSC	-	67.4233	2.31528	69.7386	0.966801	15.0299	51.8	50.76	74.2133	92.92	2.09167	1.1	1.57778	4.49167	B box
12	B2_Mm2_SINE_B2|38287864|38288044	chr6	38287916	38288126	Go2UCSC	-	68.4867	0	68.4867	1	13.4025	72.1867	36.2133	76.4133	89.1333	0	0	0	0	A and B boxes
13	B1_Mus1_SINE_Alu|133824612|133824759	chr7	133824516	133824806	Go2UCSC	-	78.8167	0.3	79.1167	0.996208	13.3869	66.3733	48.8267	75.7333	124.333	0	0.2	1	0	A and B boxes
14	B1_Mus1_SINE_Alu|23195045|23195187	chr19	23195036	23195211	Go2UCSC	+	62.7967	0	62.7967	1	13.1926	58.8133	33.0533	77.2533	82.0667	0	0	0	0	B box
15	B2_Mm1t_SINE_B2|113522164|113522344	chr8	113522107	113522266	Go2UCSC	+	58.2733	0	58.2733	1	12.6681	95.8533	41.5467	50.0933	45.6	0	0	0	0	A and B boxes
16	B3_SINE_B2|30794420|30794612	chr17	30794465	30794672	Go2UCSC	-	62.6867	0	62.6867	1	12.3399	57.76	27.7067	76.6133	88.6667	0	0	0	0	A and B boxes
17	B2_Mm1t_SINE_B2|14131833|14132020	chr16	14131871	14132075	Go2UCSC	-	53.61	5.12167	58.7317	0.912795	11.63	53.6267	26.88	59.6933	74.24	4.5	3.99333	3	8.99333	A and B boxes
18	B2_Mm1a_SINE_B2|57478569|57478762	chr19	57478665	57478829	Go2UCSC	-	44.9933	3.17534	48.1687	0.934079	10.3589	53.04	29.3333	50.32	47.28	2.74245	1.66667	3.94484	4.34742	A and B boxes
19	B2_Mm1a_SINE_B2|70786243|70786435	chr10	70786302	70786504	Go2UCSC	-	48.1267	3.49394	51.6206	0.932315	10.2625	36.7333	41.84	62.7067	51.2267	2.22122	1.75194	5.50253	4.50007	A and B boxes
20	B2_Mm1a_SINE_B2|65049246|65049441_+	chr9	65049244	65049401	Go2UCSC	+	46.4433	0.01	46.4533	0.999785	10.1426	38.9867	26.0267	55.0667	65.6933	0	0.0333333	0	0.00666667	A and B boxes
21	B2_Mm2_SINE_B2|52740563|52740657 ID4_SINE_ID|52740667|52740738	chr7	52740591	52740766	Go2UCSC	+	41.5033	0.04	41.5433	0.999037	8.72759	33.76	26.6133	52.0133	53.6267	0	0	0.0533333	0.106667	A and B boxes
22	B2_Mm2_SINE_B2|107551557|107551740	chr9	107551368	107551823	Go2UCSC	-	63.0533	0	63.0533	1	8.34039	41.36	41.0933	71.3333	98.4267	0	0	0	0	A and B boxes
23	B2_Mm1t_SINE_B225022685|25022874	chr13	25022629	25022811	Go2UCSC	+	40.2433	0	40.2433	1	8.33195	40.2667	31.4267	38.1867	51.0933	0	0	0	0	A and B boxes
24	B3_SINE_B2|135372396|135372576	chr5	135372305	135372576	Go2UCSC	-	44.6533	0	44.6533	1	7.80653	35.4667	20.08	58.5867	64.48	0	0	0	0	A and B boxes
25	B1_Mur3_SINE_Alu|55512358|55512504	chr14	55512400	55512584	Go2UCSC	+	37.4767	0	37.4767	1	7.72715	34.4533	22.16	39.24	54.0533	0	0	0	0	B box
26	B2_Mm2_SINE_B2|65926882|65927076	chr5	65926870	65927025	Go2UCSC	+	32.56	1.29083	33.8508	0.961867	7.42343	21.68	24.96	38.3467	45.2533	0.833333	0.916667	1.16333	2.25	A and B boxes
27	B2_Mm2_SINE_B2|120246914|120247104	chr1	120246867	120247052	Go2UCSC	+	32.0833	0	32.0833	1	6.60151	26.3733	27.48	42.16	32.32	0	0	0	0	A and B boxes
28	B2_Mm2_SINE_B2|31156500|31156689	chr15	31156406	31156651	Go2UCSC	+	35.0633	0.0833333	35.1467	0.997629	6.43712	33.44	29.5867	41.0133	36.2133	0	0.333333	0	0	A and B boxes
29	B2_Mm1a_SINE_B2|46080641|46080839	chr9	46080760	46081111	Go2UCSC	-	41.53	0	41.53	1	6.36963	44.2267	22.8533	46.1733	52.8667	0	0	0	0	A and B boxes
Table S5. Genomic loci other than known RNAP-III transcription units and 4.5S-related sequences that produced the most convincing peaks are listed together with their chromosomal location, a link to the UCSC genome browser, their orientation as determined by the offset between POLR3A and POLR3D peaks (see Figure 1D) and/or orientation of putative promoter elements (column 21), and the tag scores …
