# Supplementary material for: A multiplicity of factors contributes to selective RNA polymerase III occupancy of a subset of RNA polymerase III genes in mouse liver
Source: HighWire-hosted journal article supplement (doi:10.1101/gr.130286.111), 2012-01-27
Supplement: Canella_Bernasconi_Table_S7_120111.xlsx [file Canella_Bernasconi_Table_S7_120111.xlsx]

## Sheet: Sheet1
VARIABLE	UNITS	UNIVARIATE MODEL				MULTIVARIATE MODEL
		EFFECT	P-VALUE	R-SQUARED		EFFECT	P-VALUE
RNP-II density on tDNA region	LOG2_scale	1.49	< 2.2E-16	0.49		0.21	0.021
RNP-II density on RNP-II TSSs	first tertile compared to no TSS	-0.8	0.03	0.18 (P < 2.2E-16)		-0.026	0.91
	second tertile compared to no TSS	1.83	1.46e-06			0.53	0.017
	third tertile compared to no TSS	3.03	1.19e-14			0.62	0.01644
distance to closest RNP-II TSS	LOG10_scale	-1.33	2e-14	0.13		0.22	0.09616
H3K4me3 density in tDNA region	LOG2_scale	0.95	< 2.2E-16	0.77		0.73	< 2.2E-16
H3K36me3 density in tDNA region	LOG2_scale	-0.74	0.00041	0.03		-0.12	0.25
CpG density in tDNA region	by percentage	0.71	< 2.2E-16	0.36		0.11	0.0021
GC content in tDNA region	by percentage	-0.18	2.98e-09	0.08		-0.1	9.04e-11
Terminator type	weak compared to intermediate	-1.9	6.02e-07	0.16 (P = 1.4E-16)		-0.52	0.0054
	strong compared to intermediate	1.41	2.4e-07			0.1	0.46
All variables		-	-	-		R-SQUARED=0.81	< 2.2E-16
Table S7. Values for univariate and multivariate regression models. Strong terminators are 5 or more Ts in a row, intermediate terminators are 4Ts, and weak terminators are less than 4 Ts.
