# Supplementary material for: A multiplicity of factors contributes to selective RNA polymerase III occupancy of a subset of RNA polymerase III genes in mouse liver
Source: HighWire-hosted journal article supplement (doi:10.1101/gr.130286.111), 2012-01-27
Supplement: Canella_Bernasconi_Table_S9_120111.xlsx [file Canella_Bernasconi_Table_S9_120111.xlsx]

## Sheet: Sheet1
VARIABLE	UNITS	UNIVARIATE MODEL				MULTIVARIATE MODEL
		EFFECT	P-VALUE	R-SQUARED		EFFECT	P-VALUE
RNP-II density on tDNA region	LOG2_scale	1.59	<2.0E-16	0.5178		0.19147	0.042
RNP-II density on RNP-II TSSs	first tertile compared to no TSS	-0.7496	0.0439	0.19 (P < 2.2E16)		-0.05	0.83
	second tertile compared to no TSS	1.8385	1.06e-06			0.5729	0.0088
	third tertile compared to no TSS	3.0631	3.5e-15			0.73	0.0045
distance to closest RNP-II TSS	LOG_10 scale	-1.344	7.17e-15	0.1378		0.22	0.079802
H3K4me3 density in tDNA region	LOG2_scale	0.9525	<2.0E-16	0.7702		0.72	<2.0E-16
H3K36me3 density in tDNA region	LOG2_scale	-1.0589	4.46e-06	0.04873		-0.25	0.027
CpG density in tDNA region	by percentage	0.69293	<2.0E-16	0.3404		0.11	0.001271
GC content in tDNA region	by percentage	-0.19237	5.09e-11	0.09965		-0.09186	3.99e-10
Terminator type	weak compared to intermediate	-1.9153	3.69e-07	0.17 (P < 2.2E16)		-0.55	0.0028
	strong compared to intermediate	1.4361	1.07e-07			0.10367	0.44
All variables		-	-	-		R-SQUARED=0.81	< 2.2E-16
Table S9. Values for univariate and multivariate regression models using a pseudocount of 5 for the input. Strong terminators are 5 or more Ts in a row, intermediate terminators are 4Ts, and weak terminators are less than 4 Ts.
