# Supplementary material for: A multiplicity of factors contributes to selective RNA polymerase III occupancy of a subset of RNA polymerase III genes in mouse liver
Source: HighWire-hosted journal article supplement (doi:10.1101/gr.130286.111), 2012-01-27
Supplement: Canella_Bernasconi_Table_S10_120111.xlsx [file Canella_Bernasconi_Table_S10_120111.xlsx]

## Sheet: Sheet1
VARIABLE	UNITS	UNIVARIATE MODEL				MULTIVARIATE MODEL
		EFFECT	P-VALUE	R-SQUARED		EFFECT	P-VALUE
RNP-II density on tDNA region	LOG2_scale	1.56	<2.0E-16	0.51		0.21	0.029
RNP-II density on RNP-II TSSs	first tertile compared to no TSS	-0.77	0.039	0.19 (P < 2.2E16)		-0.039	0.87
	second tertile compared to no TSS	1.84	1.2e-06			0.55	0.012
	third tertile compared to no TSS	3.049	5.5e-15			0.67	0.0088
distance to closes RNP-II TSS	LOG_10 scale	-1.34	1.1e-14	0.14		0.22	0.083
H3K4me3 density in tDNA region	LOG2_scale	0.95	<2.0E-16	0.77		0.72	<2.0E-16
H3K36me3 density in tDNA region	LOG2_scale	-0.99	1.2e-05	0.044		-0.19	0.086
CpG density in tDNA region	by percentage	0.7	<2.0E-16	0.35		0.11	0.0013
GC content in tDNA region	by percentage	-0.19	2.9e-10	0.092		-0.093	3.8e-10
Terminator type	weak compared to intermediate	-1.91	4.5e-07	0.17 (P < 2.2E16)		-0.54	0.0035
	strong compared to intermediate	1.43	1.5e-07			0.1	0.46
All variables		-	-	-		R-SQUARED=0.81	< 2.2E-16
Table S10. Values for univariate and multivariate regression models using a pseudocount of 10 for the input. Strong terminators are 5 or more Ts in a row, intermediate terminators are 4Ts, and weak terminators are less than 4 Ts.
