# Supplementary material for: A multiplicity of factors contributes to selective RNA polymerase III occupancy of a subset of RNA polymerase III genes in mouse liver
Source: HighWire-hosted journal article supplement (doi:10.1101/gr.130286.111), 2012-01-27
Supplement: Copy_of_Canella_Bernasconi_Table_S1_120111.xlsx [file Copy_of_Canella_Bernasconi_Table_S1_120111.xlsx]

## Sheet: Sheet1
1	2		3	4	5	6	7	8	9	10	11	12	13	14	15	16	17	18	19
row no	tRNA gene		chr	start	end	link	Average scores for POLR3A and POLR3D in rep 1 and rep2					scores POLR3A rep1	score POLR3A rep2	scores POLR3D rep1	score POLR3D rep2	scores POLR3A rep1	score POLR3A rep2	scores POLR3D rep1	score POLR3D rep2
	UCSC browser	MGI(*)					tags with unique match	tags with multiple matches	total tags	% tags with unique match	total tag density	tags with unique match				tags with multiple matches
1	chr11_1821_tRNASer_GCT-	n-Ts17	chr11	68876544	68876625	Go2UCSC	1540.5	16.0833	1556.58	0.989668	452.495	1355.49	980.96	1921.76	1903.79	16	13.6667	18	16.6667
2	chr5_110_tRNAAla_AGC+	n-Ta15	chr5	31190888	31190960	Go2UCSC	1462.99	0	1462.99	1	392.222	1015.64	772.68	2018.71	2044.92	0	0	0	0
3	chr2_586_tRNAHis_GTG+	n-Th5	chr2	122203704	122203775	Go2UCSC	1395.19	35.4583	1430.65	0.975215	384.584	1146.8	849.853	1835.85	1748.27	33	29.875	39.9583	39
4	chr11_1911_tRNALeu_CAA_I-	n-Tl12	chr11	58115976	58116082	Go2UCSC	1413.27	0	1413.27	1	381.964	1333.89	937.813	1717.35	1664.01	0	0	0	0
5	chr10_381_tRNAAsn_GTT+	n-Tn7	chr10	79711904	79711977	Go2UCSC	959.933	4.90833	964.842	0.994913	338.541	863.92	564.96	1126.81	1284.04	6.8	2.18333	5.85	4.8
6	chr9_783_tRNAArg_ACG-	n-Tr2	chr9	123438543	123438615	Go2UCSC	1177.11	3.375	1180.49	0.997141	316.484	1109.64	827.093	1339.04	1432.67	4	2.5	4	3
7	chr2_1509_tRNASer_GCT-	n-Ts21	chr2	118872486	118872567	Go2UCSC	1199.74	1.75	1201.49	0.998543	314.525	1057.92	756.44	1422.73	1561.85	1.5	1.5	2	2
8	chr8_783_tRNAMet_CAT-	n-Tm17	chr8	124103129	124103201	Go2UCSC	1148.78	0	1148.78	1	307.984	1021.65	733.493	1414.84	1425.13	0	0	0	0
9	chr7_387_tRNAArg_TCG+	n-Tr19	chr7	86611305	86611377	Go2UCSC	1118.74	0	1118.74	1	299.931	1154.83	802.547	1271.03	1246.57	0	0	0	0
10	chr3_28_tRNATyr_GTA_I+	n-Ty2	chr3	19528782	19528870	Go2UCSC	825.327	0	825.327	1	274.195	877.693	637.587	966.16	819.867	0	0	0	0
11	chr11_1880_tRNATrp_CCA-	n-Tw5	chr11	61221418	61221489	Go2UCSC	1013.01	0	1013.01	1	272.314	714.333	516.187	1312.04	1509.47	0	0	0	0
12	chr14_188_tRNALeu_AAG+	n-Tl8	chr14	51683558	51683639	Go2UCSC	1023.02	11.0625	1034.08	0.989302	270.701	900.067	689.44	1258.27	1244.29	9.75	7.08333	13.6667	13.75
13	chr11_1824_tRNAGly_TCC-	n-Tg25	chr11	68854780	68854851	Go2UCSC	889.263	0	889.263	1	267.046	665.787	454.013	1099.39	1337.87	0	0	0	0
14	chr14_209_tRNAArg_ACG+	n-Tr6	chr14	55136533	55136605	Go2UCSC	925.387	0	925.387	1	248.093	811.707	607.76	1079.52	1202.56	0	0	0	0
15	chr3_29_tRNAAla_AGC+	n-Ta14	chr3	19528995	19529067	Go2UCSC	700.45	0	700.45	1	245.772	584.04	358.573	890.547	968.64	0	0	0	0
16	chr2_1431_tRNAHis_GTG-	n-Th3	chr2	122203099	122203170	Go2UCSC	857.617	51.8333	909.45	0.943006	244.476	797.333	558.493	1048.57	1026.07	48.5	42.375	58.4583	58
17	chr14_191_tRNATyr_GTA_I+	n-Ty10	chr14	51709164	51709253	Go2UCSC	953.02	0	953.02	1	244.364	845.773	564.56	1169.15	1232.6	0	0	0	0
18	chr15_913_tRNAMet_CAT-	n-Tm16	chr15	57807538	57807610	Go2UCSC	909.89	0	909.89	1	243.938	896.413	553.747	1036.95	1152.45	0	0	0	0
19	chr1_1006_tRNAAsn_GTT-	n-Tn6	chr1	172964073	172964146	Go2UCSC	907.693	4.25	911.943	0.99534	243.835	827.867	487.413	1109.64	1205.85	5	3.5	4	4.5
20	chr13_78_tRNAMet_CAT+	n-Tm7	chr13	21802863	21802934	Go2UCSC	902.077	1.25	903.327	0.998616	242.83	815.56	579.72	1004.23	1208.8	1	1	2	1
21	chr5_109_tRNATyr_GTA_I+	n-Ty9	chr5	31190456	31190544	Go2UCSC	939.27	0	939.27	1	241.458	848.72	581.44	1098.99	1227.93	0	0	0	0
22	chr11_206_tRNAThr_TGT+	n-Tt16	chr11	48667121	48667193	Go2UCSC	882.983	0	882.983	1	236.725	724.44	497.493	1009.97	1300.03	0	0	0	0
23	chr10_856_tRNAAsp_GTC-	n-Td16	chr10	90644842	90644913	Go2UCSC	874.317	0	874.317	1	235.031	856.867	564.853	973.68	1101.87	0	0	0	0
24	chr7_1213_tRNAThr_AGT-	n-Tt9	chr7	36019789	36019862	Go2UCSC	847.783	0	847.783	1	226.68	771.947	611.147	964.48	1043.56	0	0	0	0
25	chr8_1008_tRNALeu_CAG-	n-Tl16	chr8	97227904	97227986	Go2UCSC	839.193	15.9271	855.12	0.981374	226.222	742.84	541.36	995.947	1076.63	12.5833	11.7917	20.4583	18.875
26	chr7_441_tRNAPro_TGG+	n-Tp18	chr7	105963925	105963996	Go2UCSC	710.87	0	710.87	1	224.959	689.147	490.413	767.693	896.227	0	0	0	0
27	chr11_945_tRNAArg_CCG+	n-Tr7	chr11	106874180	106874252	Go2UCSC	838.567	0	838.567	1	224.817	796.88	547.08	910.453	1099.85	0	0	0	0
28	chr11_1432_tRNACys_GCA-	n-Tc54	chr11	97850237	97850308	Go2UCSC	821.42	0	821.42	1	220.812	616.24	440.133	1104.69	1124.61	0	0	0	0
29	chr3_746_tRNAGly_TCC-	n-Tg26	chr3	96304932	96305003	Go2UCSC	811.85	5.375	817.225	0.993423	219.684	636.933	445.72	1047.16	1117.59	6	4.5	5	6
30	chr11_401_tRNALeu_TAG+	n-Tl29	chr11	68937743	68937824	Go2UCSC	818.383	0	818.383	1	218.819	679.187	473.867	978.027	1142.45	0	0	0	0
31	chr3_27_tRNATyr_GTA_I+	n-Ty1	chr3	19528355	19528447	Go2UCSC	857.123	0	857.123	1	218.098	845.987	542.773	1061.19	978.547	0	0	0	0
32	chr11_1912_tRNAGlu_CTC-	n-Te10	chr11	58115679	58115750	Go2UCSC	725.853	1.5	727.353	0.997938	217.77	736.627	426	802.373	938.413	1	1.5	1.5	2
33	chr11_1433_tRNACys_GCA-	n-Tc55	chr11	97849560	97849631	Go2UCSC	799.39	2.875	802.265	0.996416	215.663	705.52	443.653	992.24	1056.15	3	1.5	3	4
34	chr17_113_tRNAGly_CCC+	n-Tg7	chr17	26012033	26012103	Go2UCSC	783.57	11.4967	795.067	0.98554	214.304	768.507	540	897.36	928.413	12.5	8.48667	12	13
35	chr5_1043_tRNAAsn_GTT-	n-Tn14	chr5	150040577	150040650	Go2UCSC	789.577	3.125	792.702	0.996058	211.952	711.333	583.36	1000.63	862.987	3	2.5	3	4
36	chr3_792_tRNAMet_CAT-	n-Tm11	chr3	90279782	90279853	Go2UCSC	780.41	3.875	784.285	0.995059	210.829	803.013	536.88	892.133	889.613	4	4	4	3.5
37	chr10_961_tRNAPhe_GAA-	n-Tf3	chr10	79711709	79711781	Go2UCSC	594.85	0	594.85	1	209.454	583.147	443.133	630.987	722.133	0	0	0	0
38	chr11_208_tRNAVal_AAC+	n-Tv7	chr11	48670139	48670211	Go2UCSC	723.883	0	723.883	1	208.012	598.173	436.88	844.6	1015.88	0	0	0	0
39	chr16_50_tRNAThr_CGT+	n-Tt14	chr16	13437416	13437487	Go2UCSC	754.24	0	754.24	1	202.753	753.72	591.693	901.093	770.453	0	0	0	0
40	chr14_347_tRNAGlu_TTC+	n-Te16	chr14	76552581	76552652	Go2UCSC	752.727	0	752.727	1	202.346	792.507	547.693	817.08	853.627	0	0	0	0
41	chr11_1022_tRNAArg_CCT+	n-Tr14	chr11	115274295	115274367	Go2UCSC	703.157	0	703.157	1	202.057	659.333	516.773	798.507	838.013	0	0	0	0
42	chr13_65_tRNALeu_CAA_I+	n-Tl10	chr13	21292073	21292177	Go2UCSC	815.24	0	815.24	1	201.294	712.28	527.88	989.813	1030.99	0	0	0	0
43	chr5_1314_tRNAAsp_GTC-	n-Td14	chr5	125889386	125889457	Go2UCSC	745.827	2.91667	748.743	0.996105	201.275	642.547	448.32	931.747	960.693	3	2	3.33333	3.33333
44	chr11_2022_tRNAAla_TGC-	n-Ta38	chr11	48647931	48648002	Go2UCSC	747.513	0.00449258	747.518	0.999994	200.946	681.907	483.36	905.827	918.96	0.00776153	0.00126521	0	0.00894359
45	chr1_993_tRNALeu_CAG-	n-Tl21	chr1	173031969	173032051	Go2UCSC	753.427	16.0188	769.445	0.979181	200.9	595.067	444.653	971.04	1002.95	13.85	12.725	18.925	18.575
46	chr13_90_tRNAMet_CAT+	n-Tm8	chr13	22066901	22066972	Go2UCSC	743.953	1.25	745.203	0.998323	200.323	591.347	425.253	910.92	1048.29	1	1	2	1
47	chr7_861_tRNALeu_TAG-	n-Tl27	chr7	127978993	127979074	Go2UCSC	750.117	0	750.117	1	196.366	785.693	487.52	831.4	895.853	0	0	0	0
48	chr19_109_tRNAVal_TAC+	n-Tv21	chr19	12086421	12086493	Go2UCSC	641.98	0	641.98	1	192.787	713.893	446.44	745.493	662.093	0	0	0	0
49	chr11_204_tRNAVal_CAC+	n-Tv15	chr11	48632044	48632116	Go2UCSC	719.063	0	719.063	1	192.778	688.693	438.467	841.347	907.747	0	0	0	0
50	chr13_956_tRNAIle_AAT-	n-Ti8	chr13	23529978	23530051	Go2UCSC	710.84	7.78333	718.623	0.989169	192.145	662.6	385.493	836.6	958.667	8.58333	5.34167	7.79167	9.41667
51	chr11_397_tRNAAsp_GTC+	n-Td9	chr11	68854486	68854557	Go2UCSC	637.52	0.75	638.27	0.998825	191.673	566.12	392.373	734.227	857.36	1.5	0	1	0.5
52	chr1_699_tRNAGly_GCC+	n-Tg12	chr1	172975116	172975186	Go2UCSC	699.217	0	699.217	1	188.468	558.533	387.693	898.64	952	0	0	0	0
53	chr3_48_tRNAVal_AAC+	n-Tv8	chr3	30500192	30500264	Go2UCSC	701.453	0	701.453	1	188.057	643.04	492.44	747.733	922.6	0	0	0	0
54	chr13_102_tRNAAla_AGC+	n-Ta13	chr13	23523281	23523353	Go2UCSC	697.483	0	697.483	1	186.993	452.773	315.56	996.8	1024.8	0	0	0	0
55	chr1_709_tRNAGlu_CTC+	n-Te6	chr1	173033174	173033245	Go2UCSC	603.38	3.375	606.755	0.994438	183.865	532.067	323.667	714.027	843.76	3.5	3	3	4
56	chr11_1493_tRNAGln_TTG-	n-Tq16	chr11	95720486	95720557	Go2UCSC	676.313	0	676.313	1	181.805	568.04	429.787	878.733	828.693	0	0	0	0
57	chr11_1234_tRNAArg_CCT-	n-Tr12	chr11	115274618	115274690	Go2UCSC	628.393	1.375	629.768	0.997817	180.968	566.573	345.44	825.6	775.96	0.5	1	2	2
58	chr13_952_tRNALeu_CAG-	n-Tl22	chr13	23545301	23545383	Go2UCSC	676.527	16.0188	692.545	0.97687	180.821	597.92	451.88	788.853	867.453	13.85	12.725	18.925	18.575
59	chr11_2023_tRNALys_CTT-	n-Tk10	chr11	48647385	48647457	Go2UCSC	655.313	4.25	659.563	0.993556	176.827	605.227	409.947	757.8	848.28	4	3.83333	4	5.16667
60	chr13_1001_tRNAGlu_CTC-	n-Te11	chr13	21252654	21252725	Go2UCSC	648.707	4.875	653.582	0.992541	175.694	614.933	414.627	727.08	838.187	4.5	4.5	4.5	6
61	chr11_393_tRNAIle_AAT+	n-Ti5	chr11	68850505	68850578	Go2UCSC	645.187	5.875	651.062	0.990976	174.081	589.56	380.507	704.267	906.413	5.75	2.875	7.625	7.25
62	chr2_1947_tRNAAsn_GTT-	n-Tn9	chr2	18508671	18508744	Go2UCSC	648.843	0	648.843	1	173.488	631.347	388.573	755.853	819.6	0	0	0	0
63	chr10_1316_tRNALeu_TAA-	n-Tl25	chr10	12642369	12642451	Go2UCSC	663.283	0	663.283	1	173.181	617.64	427.04	845.333	763.12	0	0	0	0
64	chr2_1432_tRNAHis_GTG-	n-Th4	chr2	122201230	122201301	Go2UCSC	594.213	48.3333	642.547	0.924778	172.728	618.52	412.867	701.547	643.92	45	39.375	54.9583	54
65	chr3_628_tRNAArg_TCT_I-	n-Tr22	chr3	121995866	121995950	Go2UCSC	663.237	0	663.237	1	172.269	595.48	433.227	786.373	837.867	0	0	0	0
66	chr6_107_tRNAArg_CCT+	n-Tr10	chr6	38483931	38484003	Go2UCSC	640.2	0	640.2	1	171.635	571.093	424.107	717.627	847.973	0	0	0	0
67	chr9_342_tRNAGln_CTG+	n-Tq9	chr9	64585853	64585924	Go2UCSC	635.223	0	635.223	1	170.759	500.173	343.44	810.107	887.173	0	0	0	0
68	chr11_1023_tRNAArg_TCG+	n-Tr18	chr11	115275093	115275165	Go2UCSC	634.563	0	634.563	1	170.124	580.947	448.867	776.2	732.24	0	0	0	0
69	chr11_1819_tRNAGly_GCC-	n-Tg13	chr11	68932296	68932366	Go2UCSC	628.787	0	628.787	1	169.484	686.6	440.013	650.827	737.707	0	0	0	0
70	chr17_995_tRNAArg_CCT-	n-Tr11	chr17	23685735	23685807	Go2UCSC	619.657	0	619.657	1	166.128	561.893	433.627	742.773	740.333	0	0	0	0
71	chr10_1095_tRNASer_TGA-	n-Ts26	chr10	62892224	62892305	Go2UCSC	631.367	0	631.367	1	165.279	733.68	549.107	653.693	588.987	0	0	0	0
72	chr7_337_tRNAGlu_TTC+	n-Te17	chr7	65654685	65654756	Go2UCSC	604.387	4.79167	609.178	0.992134	163.758	601.667	401.64	691.693	722.547	4.33333	1.83333	6	7
73	chr11_1446_tRNAAsn_GTT-	n-Tn8	chr11	97563763	97563836	Go2UCSC	600.963	8.15833	609.122	0.986606	162.867	774.267	496.413	553.653	579.52	8.13333	5.76667	9.6	9.13333
74	chr1_698_tRNALeu_CAG+	n-Tl15	chr1	172968745	172968827	Go2UCSC	605.1	15.9271	621.027	0.974354	162.148	609.36	400.72	682.613	727.707	12.5833	11.7917	20.4583	18.875
75	chr1_708_tRNAGly_TCC+	n-Tg22	chr1	173032887	173032958	Go2UCSC	519.753	7.125	526.878	0.986477	160.145	490.08	368.067	589	631.867	8	5.5	7	8
76	chr17_516_tRNAIle_TAT_I+	n-Ti17	chr17	84261284	84261376	Go2UCSC	627.403	0	627.403	1	159.645	572.733	443.227	796.413	697.24	0	0	0	0
77	chr10_688_tRNASer_CGA-	n-Ts13	chr10	127895520	127895601	Go2UCSC	603.653	0	603.653	1	158.024	600.76	396.28	683.133	734.44	0	0	0	0
78	chr14_705_tRNAPro_AGG-	n-Tp4	chr14	51684489	51684560	Go2UCSC	570.3	2.75	573.05	0.995201	157.865	627.253	429.027	619.187	605.733	4	2	3	2
79	chr12_470_tRNAIle_AAT+	n-Ti6	chr12	112083548	112083621	Go2UCSC	578.06	7.78333	585.843	0.986714	156.643	492.507	390.547	661.32	767.867	8.58333	5.34167	7.79167	9.41667
80	chr7_977_tRNAPro_AGG-	n-Tp7	chr7	105964186	105964257	Go2UCSC	485.58	0	485.58	1	153.18	532.653	333.507	499.2	576.96	0	0	0	0
81	chr14_704_tRNAThr_TGT-	n-Tt17	chr14	51684843	51684915	Go2UCSC	556.643	0	556.643	1	152.924	561.107	367.92	619.48	678.067	0	0	0	0
82	chr1_1547_tRNAGlu_TTC-	n-Te21	chr1	34491657	34491728	Go2UCSC	562.787	3.625	566.412	0.9936	152.261	619.893	391.013	639.813	600.427	3	3.5	4	4
83	chr5_1315_tRNAPhe_GAA-	n-Tf7	chr5	125886425	125886497	Go2UCSC	561.543	0.625	562.168	0.998888	150.715	529.653	345.76	635.013	735.747	1.5	0	1	0
84	chr10_851_tRNAAsp_GTC-	n-Td8	chr10	92915723	92915794	Go2UCSC	552.243	0	552.243	1	148.453	589.867	419.213	587.48	612.413	0	0	0	0
85	chr13_60_tRNAPhe_GAA+	n-Tf4	chr13	21253274	21253346	Go2UCSC	547.763	0	547.763	1	146.853	593.133	397.08	562.32	638.52	0	0	0	0
86	chr13_67_tRNAAla_AGC+	n-Ta17	chr13	21325914	21325985	Go2UCSC	541.773	0	541.773	1	145.638	415.2	275.16	652.227	824.507	0	0	0	0
87	chr13_111_tRNAMet_CAT+	n-Tm6	chr13	23609561	23609632	Go2UCSC	540.647	0	540.647	1	145.335	428.507	277.053	699.107	757.92	0	0	0	0
88	chr11_394_tRNASer_AGA+	n-Ts4	chr11	68850979	68851060	Go2UCSC	534.17	12.8311	547.001	0.976543	144.327	508.893	332.253	571.12	724.413	13.3244	8.26667	13.1667	16.5667
89	chr7_156_tRNAIle_TAT_I+	n-Ti16	chr7	29158018	29158112	Go2UCSC	561.82	0	561.82	1	142.233	581.747	414.72	707.253	543.56	0	0	0	0
90	chr11_1823_tRNAIle_AAT-	n-Ti4	chr11	68875822	68875895	Go2UCSC	519.633	9.2625	528.896	0.982487	141.416	456.52	357.773	567.773	696.467	9.33333	6.00833	10.4583	11.25
91	chr13_66_tRNAAla_AGC+	n-Ta16	chr13	21314455	21314526	Go2UCSC	523.657	0	523.657	1	140.768	402.227	318.747	617.547	756.107	0	0	0	0
92	chr13_113_tRNAGln_TTG+	n-Tq14	chr13	23610919	23610990	Go2UCSC	501.737	0	501.737	1	134.875	380.667	243.667	654.4	728.213	0	0	0	0
93	chr1_1004_tRNAGly_TCC-	n-Tg21	chr1	172968128	172968199	Go2UCSC	495.77	1.75	497.52	0.996483	133.742	416.307	288.787	546.973	731.013	2	1	2	2
94	chr3_745_tRNAGlu_CTC-	n-Te13	chr3	96305370	96305441	Go2UCSC	486.42	7.5	493.92	0.984815	132.774	527.907	413.213	490.52	514.04	7.5	4	9	9.5
95	chr11_550_tRNAThr_CGT+	n-Tt12	chr11	79518152	79518223	Go2UCSC	492.373	0	492.373	1	132.358	419.933	326.333	613.36	609.867	0	0	0	0
96	chr17_996_tRNAPro_TGG-	n-Tp16	chr17	23683443	23683514	Go2UCSC	491.22	0	491.22	1	132.048	442.92	325.853	595.893	600.213	0	0	0	0
97	chr5_702_tRNAAla_TGC+	n-Ta34	chr5	125889842	125889913	Go2UCSC	484.693	0	484.693	1	130.294	374.347	234.44	563.387	766.6	0	0	0	0
98	chr5_1317_tRNAAla_TGC-	n-Ta39	chr5	125884620	125884691	Go2UCSC	482.237	0	482.237	1	129.634	400.613	294.08	519.44	714.813	0	0	0	0
99	chr11_396_tRNAPro_CGG+	n-Tp9	chr11	68853887	68853958	Go2UCSC	474.997	0	474.997	1	127.687	471.653	314.053	538.933	575.347	0	0	0	0
100	chr13_954_tRNAVal_CAC-	n-Tv17	chr13	23538011	23538083	Go2UCSC	470.31	1.375	471.685	0.997085	126.457	408.44	325.827	575.387	571.587	1.5	0	2	2
101	chrX_459_tRNAVal_TAC+	n-Tv23	chrX	157204042	157204114	Go2UCSC	469.597	0.75	470.347	0.998405	126.098	503.147	327.733	471.973	575.533	1	1	0.5	0.5
102	chr13_947_tRNAMet_CAT-	n-Tm9	chr13	23622217	23622288	Go2UCSC	461.827	3.875	465.702	0.991679	125.189	358.733	254.373	536.547	697.653	4	4	4	3.5
103	chr11_1816_tRNALys_TTT-	n-Tk27	chr11	68938678	68938750	Go2UCSC	453.293	11.9375	465.231	0.974341	124.727	335.867	271.987	524.293	681.027	11.6667	8.75	13.25	14.0833
104	chr13_104_tRNAThr_AGT+	n-Tt6	chr13	23542491	23542564	Go2UCSC	452.393	0	452.393	1	120.961	358.747	227	559.147	664.68	0	0	0	0
105	chr11_395_tRNAThr_AGT+	n-Tt8	chr11	68851355	68851428	Go2UCSC	437.117	4	441.117	0.990932	118.899	487.813	320.493	518.12	422.04	4	2	4.5	5.5
106	chr12_790_tRNALys_CTT-	n-Tk17	chr12	72070107	72070179	Go2UCSC	433.013	3.75	436.763	0.991414	117.095	344.413	272.733	505.627	609.28	4.5	3	3.5	4
107	chr14_190_tRNAThr_TGT+	n-Tt15	chr14	51708325	51708397	Go2UCSC	433.493	0	433.493	1	116.218	326.613	239.453	534	633.907	0	0	0	0
108	chr13_958_tRNATyr_GTA_I-	n-Ty7	chr13	23524859	23524946	Go2UCSC	450.27	0	450.27	1	116.049	423.187	298.947	511.147	567.8	0	0	0	0
109	chr8_414_tRNALeu_CAG+	n-Tl17	chr8	97227531	97227613	Go2UCSC	421.387	14.6771	436.064	0.966342	115.361	421.12	259.333	494.533	510.56	11.5833	10.7917	18.4583	17.875
110	chr13_997_tRNAArg_CCG-	n-Tr9	chr13	21307327	21307399	Go2UCSC	429.19	0	429.19	1	115.064	399.667	274.893	503.093	539.107	0	0	0	0
111	chr6_317_tRNAGly_CCC+	n-Tg8	chr6	86353887	86353957	Go2UCSC	414.61	11.4967	426.107	0.973019	114.854	373.88	283.64	451.16	549.76	12.5	8.48667	12	13
112	chr6_157_tRNACys_GCA+	n-Tc57	chr6	47928996	47929067	Go2UCSC	425.757	0	425.757	1	114.451	341.547	223.907	488.36	649.213	0	0	0	0
113	chr13_92_tRNAIle_AAT+	n-Ti7	chr13	22121092	22121165	Go2UCSC	417.41	9.9375	427.347	0.976746	114.264	342.693	246.76	497.987	582.2	9.33333	5.70833	12.4583	12.25
114	chr11_398_tRNATrp_CCA+	n-Tw7	chr11	68855328	68855399	Go2UCSC	424.513	0	424.513	1	114.116	467.333	347.267	478.387	405.067	0	0	0	0
115	chr2_263_tRNAAla_CGC+	n-Ta27	chr2	57034489	57034560	Go2UCSC	389.857	0	389.857	1	113.33	366.187	267.933	435.507	489.8	0	0	0	0
116	chr1_710_tRNAVal_CAC+	n-Tv14	chr1	173041574	173041646	Go2UCSC	421.23	1.375	422.605	0.996746	113.299	412.987	261.787	478.627	531.52	1.5	0	2	2
117	chr1_1022_tRNAPro_CGG-	n-Tp8	chr1	167572402	167572473	Go2UCSC	409.92	0	409.92	1	110.194	375.24	271	479.093	514.347	0	0	0	0
118	chr14_359_tRNAGlu_TTC+	n-Te14	chr14	79881475	79881546	Go2UCSC	405.713	3.625	409.338	0.991144	110.037	370.293	258.187	478.107	516.267	3	3.5	4	4
119	chr3_298_tRNAAsn_GTT+	n-Tn12	chr3	96301704	96301777	Go2UCSC	400.937	5.5	406.437	0.986468	108.673	378.373	247.933	474.293	503.147	6	4.5	5	6.5
120	chr13_999_tRNAMet_CAT-	n-Tm15	chr13	21261556	21261628	Go2UCSC	389.76	0.875	390.635	0.99776	108.209	401.387	274.493	411.707	471.453	1	1.5	0	1
121	chr4_16_tRNASer_AGA+	n-Ts9	chr4	10801211	10801292	Go2UCSC	396.803	9.28944	406.093	0.977125	106.307	325.587	225.387	491.507	544.733	8.99111	6.5	9.83333	11.8333
122	chr3_748_tRNALys_CTT-	n-Tk16	chr3	96303435	96303507	Go2UCSC	394.61	0	394.61	1	105.794	305.2	266.48	482.347	524.413	0	0	0	0
123	chr14_192_tRNAPro_TGG+	n-Tp15	chr14	51710322	51710393	Go2UCSC	389.433	0	389.433	1	104.686	344.88	250.88	453.16	508.813	0	0	0	0
124	chr1_672_tRNAPro_AGG+	n-Tp2	chr1	167571765	167571836	Go2UCSC	375.9	2.75	378.65	0.992737	101.788	325.387	218.587	450.6	509.027	4	2	3	2
125	chr13_106_tRNATyr_GTA_I+	n-Ty8	chr13	23558945	23559034	Go2UCSC	395.92	0	395.92	1	101.518	327.107	240.28	500.107	516.187	0	0	0	0
126	chr17_994_tRNAArg_CCG-	n-Tr8	chr17	23687230	23687302	Go2UCSC	377.797	0	377.797	1	101.286	309	252.52	434.093	515.573	0	0	0	0
127	chr19_107_tRNALys_TTT+	n-Tk29	chr19	12080529	12080601	Go2UCSC	372.313	3.4375	375.751	0.990852	100.737	331.267	232.027	436.147	489.813	3.83333	2.08333	3.75	4.08333
128	chr13_948_tRNAArg_TCG-	n-Tr15	chr13	23618325	23618397	Go2UCSC	367.953	0	367.953	1	98.647	327.467	224.52	449.52	470.307	0	0	0	0
129	chr11_791_tRNACys_GCA+	n-Tc56	chr11	97658386	97658457	Go2UCSC	353.623	2.875	356.498	0.991935	95.8329	268.547	162.28	442.987	540.68	3	1.5	3	4
130	chr13_970_tRNASer_GCT-	n-Ts19	chr13	22142555	22142636	Go2UCSC	345.36	15.5833	360.943	0.956826	94.4878	357.8	247.8	417.747	358.093	16	13.1667	17	16.1667
131	chr13_112_tRNASer_TGA+	n-Ts24	chr13	23610015	23610096	Go2UCSC	351.693	6.125	357.818	0.982882	93.6697	360.013	230.547	407.867	408.347	8.5	3.5	6	6.5
132	chr19_637_tRNAArg_TCT_I-	n-Tr21	chr19	12086078	12086163	Go2UCSC	338.343	0	338.343	1	92.9515	381.213	223.147	378.187	370.827	0	0	0	0
133	chr9_1035_tRNALys_CTT-	n-Tk18	chr9	90021347	90021419	Go2UCSC	341.46	3.75	345.21	0.989137	92.5496	241.68	178.36	412.227	533.573	4.5	3	3.5	4
134	chr11_1822_tRNAThr_AGT-	n-Tt7	chr11	68876246	68876319	Go2UCSC	306.347	4	310.347	0.987111	92.3651	243.987	163.733	378.707	438.96	4	2	4.5	5.5
135	chr10_857_tRNATrp_CCA-	n-Tw2	chr10	90644157	90644228	Go2UCSC	342.093	0	342.093	1	91.9606	289.547	272.533	405.107	401.187	0	0	0	0
136	chr13_115_tRNASer_GCT+	n-Ts18	chr13	23613739	23613820	Go2UCSC	333.677	17.5833	351.26	0.949942	91.9529	231.36	160.493	395.853	547	18	15.1667	19	18.1667
137	chr13_63_tRNALeu_AAG+	n-Tl5	chr13	21262075	21262156	Go2UCSC	249.187	1.25	250.437	0.995009	90.7379	198.507	147.373	270.947	379.92	0	1	2	2
138	chr13_979_tRNAAsp_GTC-	n-Td12	chr13	22032188	22032259	Go2UCSC	329.923	0	329.923	1	88.6891	366.347	251.253	348.16	353.933	0	0	0	0
139	chr3_1040_tRNAArg_ACG-	n-Tr3	chr3	19527959	19528031	Go2UCSC	330.807	0	330.807	1	88.6881	273.613	202.72	387.653	459.24	0	0	0	0
140	chr13_972_tRNASer_CGA-	n-Ts12	chr13	22114288	22114369	Go2UCSC	334.667	0	334.667	1	87.6091	218.2	181.853	410.027	528.587	0	0	0	0
141	chr13_973_tRNAArg_ACG-	n-Tr1	chr13	22113013	22113085	Go2UCSC	321.863	3.375	325.238	0.989623	87.1953	260.32	209.133	376.013	441.987	4	2.5	4	3
142	chr17_84_tRNALys_CTT+	n-Tk14	chr17	23684327	23684399	Go2UCSC	322.71	1.25	323.96	0.996141	86.8525	338.773	162.627	340.347	449.093	2	0	1.33333	1.66667
143	chr11_207_tRNAPro_TGG+	n-Tp14	chr11	48669782	48669853	Go2UCSC	313.61	0	313.61	1	86.1566	286.733	176.76	356.733	434.213	0	0	0	0
144	chr10_81_tRNAGlu_CTC+	n-Te9	chr10	30530946	30531017	Go2UCSC	316.413	0.875	317.288	0.997242	85.2926	262.253	164.853	378.387	460.16	0.5	0.5	1.25	1.25
145	chr19_639_tRNALys_TTT-	n-Tk30	chr19	12084186	12084258	Go2UCSC	304.427	7.875	312.302	0.974784	83.727	218.56	145.12	371.747	482.28	7.58333	6.16667	9	8.75
146	chr7_559_tRNALeu_AAG+	n-Tl4	chr7	128061031	128061112	Go2UCSC	309.747	4.9375	314.684	0.98431	82.3781	258.347	193.467	385.773	401.4	2.75	4.25	6.5	6.25
147	chr3_747_tRNAHis_GTG-	n-Th8	chr3	96304289	96304360	Go2UCSC	294.463	6.58333	301.047	0.978132	80.9265	254.267	200.88	359.867	362.84	4.91667	5.95833	8.20833	7.25
148	chr1_1001_tRNAGly_TCC-	n-Tg20	chr1	172994830	172994901	Go2UCSC	121.747	169.708	291.454	0.417721	78.348	83.12	62.7067	178.16	163	154.773	119.987	222.044	182.027
149	chr13_110_tRNAGly_GCC+	n-Tg27	chr13	23609072	23609142	Go2UCSC	284.867	0	284.867	1	76.7835	251.893	174.32	312.213	401.04	0	0	0	0
150	chr13_1000_tRNALys_TTT-	n-Tk28	chr13	21259944	21260016	Go2UCSC	280.017	4.6875	284.704	0.983536	76.3282	199.853	158.56	301.173	460.48	5.16667	2.75	5.75	5.08333
151	chr13_974_tRNAVal_AAC-	n-Tv3	chr13	22107660	22107732	Go2UCSC	279.64	0.06875	279.709	0.999754	74.9889	313.533	155.053	289.373	360.6	0.0866667	0.02	0.108333	0.06
152	chr13_109_tRNATrp_CCA+	n-Tw4	chr13	23598388	23598459	Go2UCSC	276.637	0	276.637	1	74.3647	237.013	154.253	364.293	350.987	0	0	0	0
153	chr7_86_tRNASeC(e)_TCA+	n-Ts2	chr7	19886593	19886678	Go2UCSC	282.707	0	282.707	1	73.2401	273.853	188.6	343.413	324.96	0	0	0	0
154	chr1_485_tRNALys_TTT+	n-Tk26	chr1	134930539	134930611	Go2UCSC	257.853	3.0625	260.916	0.988262	70.7089	260.533	144.053	271.173	355.653	2.75	2.25	3.25	4
155	chr13_64_tRNAGln_CTG+	n-Tq7	chr13	21264220	21264291	Go2UCSC	260.567	0	260.567	1	70.0448	194.227	163.347	318.373	366.32	0	0	0	0
156	chr13_990_tRNAIle_AAT-	n-Ti11	chr13	21947189	21947262	Go2UCSC	253.703	7.1875	260.891	0.97245	69.7569	220.387	128.12	355.72	310.587	6.83333	4.70833	8.45833	8.75
157	chr13_91_tRNAVal_CAC+	n-Tv16	chr13	22118417	22118489	Go2UCSC	257.557	0	257.557	1	69.05	231.387	159.453	315.253	324.133	0	0	0	0
158	chr19_106_tRNAPhe_GAA+	n-Tf6	chr19	12076726	12076798	Go2UCSC	252.18	0.875	253.055	0.996542	67.8432	207.72	139.96	283.773	377.267	0	0.5	2	1
159	chr13_62_tRNALeu_AAG+	n-Tl7	chr13	21261905	21261986	Go2UCSC	165.533	12.4375	177.971	0.930115	67.4132	172.16	169.867	156	164.107	10.75	8.58333	15.1667	15.25
160	chr5_1316_tRNAAsp_GTC-	n-Td15	chr5	125885977	125886048	Go2UCSC	248.867	0.25	249.117	0.998996	66.9668	293	183.053	253.347	266.067	0	0	1	0
161	chr1_1002_tRNAGlu_CTC-	n-Te5	chr1	172994295	172994366	Go2UCSC	39.1167	205.042	244.159	0.16021	65.6341	38.3867	12.8933	62.9467	42.24	188.953	164.647	255.294	211.274
162	chr13_114_tRNAGln_TTG+	n-Tq15	chr13	23611482	23611553	Go2UCSC	241.317	0	241.317	1	64.8701	180.227	123.547	306.187	355.307	0	0	0	0
163	chr19_638_tRNALeu_TAA-	n-Tl26	chr19	12085576	12085658	Go2UCSC	243.247	0	243.247	1	63.5109	177.627	106.16	299.347	389.853	0	0	0	0
164	chr1_707_tRNAAsp_GTC+	n-Td5	chr1	173032502	173032573	Go2UCSC	234.23	0.75	234.98	0.996808	63.1667	239.947	194.187	246.707	256.08	0.5	1	1.5	0
165	chr11_205_tRNAGly_ACC+	n-Tg1	chr11	48637230	48637303	Go2UCSC	232.293	0	232.293	1	62.1105	174.813	126.28	285.853	342.227	0	0	0	0
166	chr1_1005_tRNAAsp_GTC-	n-Td4	chr1	172967160	172967231	Go2UCSC	225.787	2.2	227.987	0.99035	61.2867	211.08	141.76	246.933	303.373	1.4	2.43333	3.06667	1.9
167	chr13_77_tRNAGly_GCC+	n-Tg28	chr13	21802449	21802519	Go2UCSC	223.98	0.833333	224.813	0.996293	60.5966	177.96	122.96	262.16	332.84	0.333333	1	1.33333	0.666667
168	chr19_8_tRNAAla_AGC+	n-Ta9	chr19	3576263	3576335	Go2UCSC	225.197	0	225.197	1	60.3744	138.773	105.867	293.72	362.427	0	0	0	0
169	chr13_955_tRNAAla_CGC-	n-Ta29	chr13	23530566	23530637	Go2UCSC	223.377	0	223.377	1	60.0475	178.507	134.12	224.2	356.68	0	0	0	0
170	chr2_1747_tRNAGly_GCC-	n-Tg29	chr2	57034805	57034875	Go2UCSC	201.893	0	201.893	1	58.861	180.04	96.0933	241.747	289.693	0	0	0	0
171	chr11_400_tRNASer_CGA+	n-Ts14	chr11	68924421	68924502	Go2UCSC	223.353	0	223.353	1	58.4695	224.053	154.52	234.547	280.293	0	0	0	0
172	chr1_996_tRNAGlu_CTC-	n-Te7	chr1	173009537	173009608	Go2UCSC	23.7033	192.672	216.376	0.109547	58.1655	18.1467	16.4533	29.7067	30.5067	183.473	154.147	237.794	195.274
173	chr13_994_tRNAMet_CAT-	n-Tm13	chr13	21418586	21418658	Go2UCSC	215.7	0	215.7	1	57.8284	163.44	125.133	283.067	291.16	0	0	0	0
174	chr11_399_tRNAThr_AGT+	n-Tt5	chr11	68923967	68924040	Go2UCSC	215.29	0	215.29	1	57.5642	177.813	123.56	262.507	297.28	0	0	0	0
175	chr19_711_tRNASer_GCT-	n-Ts20	chr19	5038304	5038385	Go2UCSC	217.933	0	217.933	1	57.0506	184.013	144.88	279.933	262.907	0	0	0	0
176	chr14_457_tRNAPhe_GAA-	n-Tf5	chr14	118488747	118488819	Go2UCSC	206.327	1.5	207.827	0.992782	55.7176	190.547	116.907	254.147	263.707	1.5	0.5	3	1
177	chr13_988_tRNAPhe_GAA-	n-Tf1	chr13	21974754	21974826	Go2UCSC	207.76	0	207.76	1	55.6997	210.293	122.733	228.493	269.52	0	0	0	0
178	chr13_86_tRNASer_AGA+	n-Ts5	chr13	22011084	22011165	Go2UCSC	199.267	12.8311	212.098	0.939504	55.523	163.453	90.7067	288.347	254.56	13.3244	8.26667	13.1667	16.5667
179	chr1_999_tRNAGlu_CTC-	n-Te8	chr1	173001923	173001994	Go2UCSC	3.16667	202.234	205.401	0.015417	55.2152	2.08	3.64	3.13333	3.81333	187.113	162.867	249.981	208.974
180	chr8_560_tRNAGly_GCC+	n-Tg10	chr8	113586461	113586531	Go2UCSC	204.223	0	204.223	1	55.0467	200.467	144.813	233.6	238.013	0	0	0	0
181	chr1_995_tRNAGly_TCC-	n-Tg23	chr1	173010079	173010150	Go2UCSC	0	193.886	193.886	0	52.1199	0	0	0	0	172.813	132.853	254.864	215.013
182	chr1_998_tRNAGly_TCC-	n-Tg24	chr1	173002465	173002536	Go2UCSC	0	193.886	193.886	0	52.1199	0	0	0	0	172.813	132.853	254.864	215.013
183	chr1_702_tRNAGly_GCC+	n-Tg17	chr1	172996762	172996832	Go2UCSC	58.04	123.298	181.338	0.320066	48.8781	55.2667	37.2933	65.72	73.88	93.4422	89.0156	150.884	159.849
184	chr3_303_tRNAGlu_CTC+	n-Te12	chr3	96962008	96962079	Go2UCSC	173.633	7.5	181.133	0.958594	48.6918	161.48	132.28	189.253	211.52	7.5	4	9	9.5
185	chr11_1820_tRNATrp_CCA-	n-Tw6	chr11	68876997	68877068	Go2UCSC	179.297	0	179.297	1	48.198	215.027	146.04	178.493	177.627	0	0	0	0
186	chr13_103_tRNALys_CTT+	n-Tk11	chr13	23528209	23528281	Go2UCSC	171.133	1.75	172.883	0.989878	46.3494	124.987	101.64	209.08	248.827	2	1.33333	1.5	2.16667
187	chr1_706_tRNAGly_GCC+	n-Tg19	chr1	173012007	173012077	Go2UCSC	58.1333	111.158	169.292	0.343392	45.6312	42.5333	36.72	81.2267	72.0533	85.0378	81.4356	134.884	143.276
188	chr13_989_tRNAIle_AAT-	n-Ti10	chr13	21973902	21973975	Go2UCSC	158.927	9.2625	168.189	0.944928	44.9704	131.16	75.52	205.107	223.92	9.33333	6.00833	10.4583	11.25
189	chr13_949_tRNAArg_TCG-	n-Tr17	chr13	23595849	23595921	Go2UCSC	167.29	0	167.29	1	44.8499	118.627	85.6	223.067	241.867	0	0	0	0
190	chr11_2021_tRNALeu_AAG-	n-Tl6	chr11	48670476	48670557	Go2UCSC	151.217	11.0625	162.279	0.93183	44.5822	140.733	75.2267	179.107	209.8	9.75	7.08333	13.6667	13.75
191	chr13_978_tRNASer_AGA-	n-Ts8	chr13	22032783	22032864	Go2UCSC	157.747	11.4144	169.161	0.932523	44.283	132.28	80.68	180.867	237.16	9.99111	8.6	11.8333	15.2333
192	chr1_1000_tRNAAsp_GTC-	n-Td3	chr1	172995489	172995560	Go2UCSC	64.0933	98.3356	162.429	0.394593	43.6637	48.64	54.72	94.24	58.7733	96.6678	77.1267	133.829	85.7189
193	chr13_953_tRNAArg_ACG-	n-Tr5	chr13	23538661	23538733	Go2UCSC	159.477	0	159.477	1	42.7551	99.6133	91.6667	205.08	241.547	0	0	0	0
194	chr11_1442_tRNACys_GCA-	n-Tc51	chr11	97660220	97660291	Go2UCSC	156.327	0	156.327	1	42.0233	180.36	107.44	164.8	172.707	0	0	0	0
195	chr1_704_tRNAGly_GCC+	n-Tg18	chr1	173004433	173004503	Go2UCSC	46.16	105.506	151.666	0.304353	40.8804	40.68	32.1867	50.1067	61.6667	78.8889	77.6156	130.111	135.409
196	chr3_291_tRNAHis_GTG+	n-Th6	chr3	96213992	96214063	Go2UCSC	144.17	3.875	148.045	0.973826	39.797	135.467	104.8	165.773	170.64	2.75	3.125	4.875	4.75
197	chr13_61_tRNAMet_CAT+	n-Tm14	chr13	21259473	21259545	Go2UCSC	138.497	0.875	139.372	0.993722	37.3651	149.307	80.1733	173.72	150.787	1	1.5	0	1
198	chr13_105_tRNAGlu_TTC+	n-Te15	chr13	23555404	23555475	Go2UCSC	133.81	2.41667	136.227	0.98226	36.6201	98.3733	67.8933	182.64	186.333	2.33333	1.33333	3	3
199	chr6_46_tRNAPro_AGG+	n-Tp6	chr6	29338824	29338895	Go2UCSC	123.2	0	123.2	1	33.1183	114.36	58.3467	164.973	155.12	0	0	0	0
200	chr13_998_tRNALeu_CAA_I-	n-Tl9	chr13	21264706	21264811	Go2UCSC	131.55	0	131.55	1	32.4015	108.787	73.1067	175.987	168.32	0	0	0	0
201	chr3_92_tRNAPro_TGG+	n-Tp17	chr3	51162276	51162347	Go2UCSC	120.003	0	120.003	1	32.259	149.707	97.6	127.72	104.987	0	0	0	0
202	chr17_458_tRNACys_GCA+	n-Tc52	chr17	71948611	71948682	Go2UCSC	119.67	0	119.67	1	32.1694	100.893	65.08	167.84	144.867	0	0	0	0
203	chr13_81_tRNAThr_AGT+	n-Tt4	chr13	21947890	21947963	Go2UCSC	118.443	0	118.443	1	31.6693	133.32	69.5733	93.4667	177.413	0	0	0	0
204	chr13_961_tRNATyr_GTA_I-	n-Ty3	chr13	23517515	23517603	Go2UCSC	119.007	0	119.007	1	30.593	120.573	70.1467	123.027	162.28	0	0	0	0
205	chr1_997_tRNAAsp_GTC-	n-Td7	chr1	173003124	173003195	Go2UCSC	0	113.794	113.794	0	30.5898	0	0	0	0	105.168	88.96	155.162	105.886
206	chr1_994_tRNAAsp_GTC-	n-Td6	chr1	173010738	173010809	Go2UCSC	0	113.794	113.794	0	30.5898	0	0	0	0	105.168	88.96	155.162	105.886
207	chr13_957_tRNAPro_AGG-	n-Tp3	chr13	23528863	23528934	Go2UCSC	110.813	0.5	111.313	0.995508	29.9229	99.9867	57.7067	137.24	148.32	1	0.5	0	0.5
208	chr14_703_tRNALeu_TAG-	n-Tl28	chr14	51702505	51702586	Go2UCSC	111.833	0	111.833	1	29.2757	75.2667	67.6667	139.813	164.587	0	0	0	0
209	chr11_1817_tRNAGln_CTG-	n-Tq6	chr11	68938109	68938180	Go2UCSC	99.4933	0	99.4933	1	27.3333	93.16	59.9467	117.84	127.027	0	0	0	0
210	chr1_1392_tRNAGly_GCC-	n-Tg11	chr1	74863321	74863391	Go2UCSC	100.597	0	100.597	1	27.115	82.5733	61.7733	125.707	132.333	0	0	0	0
211	chr17_82_tRNALys_CTT+	n-Tk13	chr17	23670929	23671001	Go2UCSC	38.0467	55.5083	93.555	0.406677	25.0818	26.7867	24.48	42.5467	58.3733	50.4867	35.8733	71.0533	64.62
212	chr13_71_tRNAAla_AGC+	n-Ta19	chr13	21351637	21351708	Go2UCSC	90.5033	0	90.5033	1	24.3289	58.52	34.92	132.72	135.853	0	0	0	0
213	chr11_1818_tRNAArg_TCT_I-	n-Tr25	chr11	68936984	68937070	Go2UCSC	93.2967	0	93.2967	1	24.1077	75.64	61.84	106.88	128.827	0	0	0	0
214	chr13_980_tRNASer_AGA-	n-Ts10	chr13	22028963	22029044	Go2UCSC	88.77	0	88.77	1	23.2382	70.4133	51.3867	132.96	100.32	0	0	0	0
215	chr19_110_tRNAVal_TAC+	n-Tv22	chr19	12086756	12086828	Go2UCSC	81.23	0.75	81.98	0.990851	23.1582	67.8267	43.4267	99.1467	114.52	1	1	0.5	0.5
216	chr17_1000_tRNALys_CTT-	n-Tk12	chr17	23672299	23672371	Go2UCSC	25.81	55.5083	81.3183	0.317395	21.8012	20.8667	13.6133	36.1333	32.6267	50.4867	35.8733	71.0533	64.62
217	chr3_294_tRNAAsn_GTT+	n-Tn11	chr3	96255348	96255421	Go2UCSC	0	80.4267	80.4267	0	21.5045	0	0	0	0	74.2	48.7233	115.97	82.8133
218	chr3_750_tRNAAsn_GTT-	n-Tn13	chr3	96263061	96263134	Go2UCSC	0	80.4267	80.4267	0	21.5045	0	0	0	0	74.2	48.7233	115.97	82.8133
219	chr3_93_tRNAPro_AGG+	n-Tp5	chr3	51163329	51163400	Go2UCSC	79.3633	0.5	79.8633	0.993739	21.4686	86.4667	34.4267	95.12	101.44	1	0.5	0	0.5
220	chr13_97_tRNAVal_CAC+	n-Tv12	chr13	23391991	23392063	Go2UCSC	69.87	0	69.87	1	18.7319	69.48	26.44	113.56	70	0	0	0	0
221	chr1_701_tRNALeu_CAG+	n-Tl18	chr1	172996115	172996197	Go2UCSC	17.9867	50.686	68.6726	0.261919	17.9302	16.2133	15.2	29.3867	11.1467	37.7233	42.845	64.2961	57.8794
222	chr13_950_tRNASer_AGA-	n-Ts7	chr13	23592826	23592907	Go2UCSC	56.72	9.20611	65.9261	0.860357	17.2581	47.6267	29.4267	93.4133	56.4133	8.32444	6.76667	10.1667	11.5667
223	chr3_753_tRNAGln_CTG-	n-Tq4	chr3	96202982	96203053	Go2UCSC	59.6067	0.75	60.3567	0.987574	16.2249	44.2933	28.6533	89.28	76.2	1	1	0	1
224	chr13_87_tRNAGln_CTG+	n-Tq10	chr13	22012069	22012140	Go2UCSC	60.14	0	60.14	1	16.1667	46.8	29.6267	74.9733	89.16	0	0	0	0
225	chr13_68_tRNAAla_TGC+	n-Ta40	chr13	21332814	21332885	Go2UCSC	59.2767	0	59.2767	1	15.9346	38.8933	30.64	76.6	90.9733	0	0	0	0
226	chr1_1184_tRNALys_TTT-	n-Tk25	chr1	134930904	134930976	Go2UCSC	57.7767	0	57.7767	1	15.6576	43.4533	40.1867	55.5467	91.92	0	0	0	0
227	chr13_101_tRNATyr_GTA_I+	n-Ty4	chr13	23518374	23518461	Go2UCSC	59.43	0	59.43	1	15.317	42.96	34.6533	91.9867	68.12	0	0	0	0
228	chr1_705_tRNALeu_CAG+	n-Tl20	chr1	173011364	173011446	Go2UCSC	0	55.436	55.436	0	14.4741	0	0	0	0	39.2233	47.845	71.7961	62.8794
229	chr1_703_tRNALeu_CAG+	n-Tl19	chr1	173003750	173003832	Go2UCSC	0.976667	54.3326	55.3093	0.0176583	14.4411	0.906667	1.22667	0.173333	1.6	37.8967	46.8983	70.2561	62.2794
230	chr13_107_tRNATrp_CCA+	n-Tw3	chr13	23589975	23590046	Go2UCSC	50.5667	0	50.5667	1	13.5932	36.2933	35.36	59.4133	71.2	0	0	0	0
231	chr3_289_tRNAAsn_GTT+	n-Tn10	chr3	96206141	96206214	Go2UCSC	44.09	3.825	47.915	0.920171	12.8115	45.32	25.6133	53.76	51.6667	5.8	1.85	4.85	2.8
232	chr13_95_tRNAVal_AAC+	n-Tv6	chr13	23390650	23390722	Go2UCSC	41.08	0	41.08	1	12.6012	29.7333	25.5467	61.3467	47.6933	0	0	0	0
233	chr13_968_tRNAIle_AAT-	n-Ti9	chr13	23400921	23400994	Go2UCSC	37.55	7.40833	44.9583	0.835218	12.0209	28.24	20.08	55.7067	46.1733	7.75	5.50833	7.45833	8.91667
234	chr3_295_tRNAHis_GTG+	n-Th7	chr3	96256418	96256489	Go2UCSC	0	42.7783	42.7783	0	11.4996	0	0	0	0	33.2367	36.7517	56.3617	44.7633
235	chr3_751_tRNAHis_GTG-	n-Th9	chr3	96261993	96262064	Go2UCSC	0	42.7783	42.7783	0	11.4996	0	0	0	0	33.2367	36.7517	56.3617	44.7633
236	chr13_981_tRNAAsp_GTC-	n-Td13	chr13	22027366	22027437	Go2UCSC	40.3367	1	41.3367	0.975808	11.112	41.7333	23.3067	53.2267	43.08	1.5	0	2	0.5
237	chr13_70_tRNAAla_CGC+	n-Ta28	chr13	21346089	21346160	Go2UCSC	40.1767	0	40.1767	1	10.8002	44.64	29.68	42.56	43.8267	0	0	0	0
238	chr13_94_tRNAAla_AGC+	n-Ta10	chr13	23377518	23377590	Go2UCSC	30.1433	0.125	30.2683	0.99587	9.73258	26.92	11.1467	43.5467	38.96	0	0	0.5	0
239	chr17_83_tRNAPro_CGG+	n-Tp10	chr17	23677882	23677953	Go2UCSC	35.1233	0	35.1233	1	9.44176	24.9733	21.0133	43.3467	51.16	0	0	0	0
240	chr13_74_tRNAArg_TCG+	n-Tr16	chr13	21371565	21371637	Go2UCSC	33.5	0	33.5	1	8.98123	29.0533	20.8667	40.6	43.48	0	0	0	0
241	chr13_72_tRNAThr_CGT+	n-Tt11	chr13	21356449	21356522	Go2UCSC	33.15	0	33.15	1	8.86364	28.3733	13.9467	37.6667	52.6133	0	0	0	0
242	chr11_1444_tRNACys_GCA-	n-Tc18	chr11	97631143	97631214	Go2UCSC	31.2467	0	31.2467	1	8.39964	23.0533	12.7733	43.9333	45.2267	0	0	0	0
243	chr13_98_tRNAVal_CAC+	n-Tv19	chr13	23399498	23399570	Go2UCSC	28.9667	0	28.9667	1	7.76586	23.1733	15	45.84	31.8533	0	0	0	0
244	chr13_75_tRNAThr_CGT+	n-Tt13	chr13	21414682	21414755	Go2UCSC	28.43	0	28.43	1	7.6016	21.1333	13.0133	39.76	39.8133	0	0	0	0
245	chr13_976_tRNASer_GCT-	n-Ts22	chr13	22086059	22086140	Go2UCSC	27.3233	0	27.3233	1	7.15271	18.2667	19.0933	35.0267	36.9067	0	0	0	0
246	chr13_108_tRNAMet_CAT+	n-Tm5	chr13	23591949	23592020	Go2UCSC	22.1	0	22.1	1	5.94086	22.7067	9.58667	24.32	31.7867	0	0	0	0
247	chr3_297_tRNAGln_CTG+	n-Tq3	chr3	96283314	96283385	Go2UCSC	20.4133	0.75	21.1633	0.964561	5.68907	15.4267	11.4267	26.6267	28.1733	1	1	0	1
248	chr13_975_tRNAGln_CTG-	n-Tq1	chr13	22088450	22088521	Go2UCSC	21.1333	0	21.1333	1	5.681	7.2	13.3067	31.4533	32.5733	0	0	0	0
249	chr13_962_tRNAVal_AAC-	n-Tv5	chr13	23505117	23505189	Go2UCSC	18.6333	0	18.6333	1	5.48039	10.0267	14.84	26.8267	22.84	0	0	0	0
250	chr13_991_tRNALeu_TAA-	n-Tl24	chr13	21939891	21939973	Go2UCSC	20.38	0.256667	20.6367	0.987563	5.38816	17.2267	14.1867	30.3867	19.72	0	0	0.373333	0.653333
251	chr13_99_tRNAMet_CAT+	n-Tm12	chr13	23409335	23409407	Go2UCSC	19.8967	0	19.8967	1	5.33423	21.2533	12.4267	27.6133	18.2933	0	0	0	0
252	chr13_96_tRNAAla_AGC+	n-Ta11	chr13	23390930	23391002	Go2UCSC	17.1733	0.125	17.2983	0.992774	5.29001	16.04	7.16	27.6267	17.8667	0	0	0.5	0
253	chr13_984_tRNASer_TGA-	n-Ts25	chr13	22016804	22016885	Go2UCSC	13.8067	6.125	19.9317	0.6927	5.21771	14.8667	6.2	18.48	15.68	8.5	3.5	6	6.5
254	chr3_287_tRNAGly_CCC+	n-Tg4	chr3	96186834	96186904	Go2UCSC	0	18.8617	18.8617	0	5.08401	0	0	0	0	11.4933	13.5933	33.54	16.82
255	chr3_755_tRNAGly_CCC-	n-Tg5	chr3	96155090	96155160	Go2UCSC	0	18.8617	18.8617	0	5.08401	0	0	0	0	11.4933	13.5933	33.54	16.82
256	chr9_961_tRNAGlu_TTC-	n-Te18	chr9	104310997	104311068	Go2UCSC	13.9033	4.79167	18.695	0.743693	5.02554	13.3733	8.13333	15.2267	18.88	4.33333	1.83333	6	7
257	chr13_982_tRNAGln_CTG-	n-Tq8	chr13	22025830	22025901	Go2UCSC	18.04	0	18.04	1	4.84946	13.7467	8.86667	26.8133	22.7333	0	0	0	0
258	chr13_85_tRNALeu_CAA_I+	n-Tl11	chr13	22006707	22006812	Go2UCSC	19.5533	0	19.5533	1	4.81609	20.2667	9.45333	21.4133	27.08	0	0	0	0
259	chr13_966_tRNAAla_AGC-	n-Ta12	chr13	23492664	23492736	Go2UCSC	15.6367	0	15.6367	1	4.81128	4.98667	12.48	20.2667	24.8133	0	0	0	0
260	chr3_284_tRNAVal_CAC+	n-Tv18	chr3	96136663	96136735	Go2UCSC	17.6533	0	17.6533	1	4.7328	13.28	1.96	27.92	27.4533	0	0	0	0
261	chr13_963_tRNAAla_AGC-	n-Ta7	chr13	23504810	23504882	Go2UCSC	15.8033	0	15.8033	1	4.64804	20.64	7.97333	14.2	20.4	0	0	0	0
262	chr13_985_tRNAArg_TCT_I-	n-Tr23	chr13	22009031	22009116	Go2UCSC	17.6133	0	17.6133	1	4.56304	16.5467	8.81333	20.2133	24.88	0	0	0	0
263	chr13_88_tRNASer_AGA+	n-Ts6	chr13	22019726	22019807	Go2UCSC	5.83333	11.4144	17.2478	0.338208	4.51513	1.46667	2.02667	9.70667	10.1333	9.99111	8.6	11.8333	15.2333
364	chr13_965_tRNAVal_AAC-	n-Tv2	chr13	23492942	23493014	Go2UCSC	14.41	0	14.41	1	4.42025	16.4933	10.88	9.45333	20.8133	0	0	0	0
265	chr11_1849_tRNATrp_CCA-	n-Tw8	chr11	62559517	62559588	Go2UCSC	15.9767	0	15.9767	1	4.2948	22.7867	12.2933	10.9867	17.84	0	0	0	0
266	chr13_996_tRNAThr_AGT-	n-Tt3	chr13	21341063	21341136	Go2UCSC	15.3367	0	15.3367	1	4.10071	12.6267	5.44	20.1333	23.1467	0	0	0	0
267	chr3_292_tRNALys_CTT+	n-Tk15	chr3	96232158	96232230	Go2UCSC	10.0667	4.75	14.8167	0.679415	3.9723	4.05333	8.10667	20	8.10667	5	3.83333	4.5	5.66667
268	chr13_987_tRNAIle_TAT_I-	n-Ti14	chr13	21988807	21988900	Go2UCSC	15.5767	0	15.5767	1	3.95347	12.68	8.06667	22.8933	18.6667	0	0	0	0
269	chr4_1697_tRNAHis_GTG-	n-Th10	chr4	82265527	82265598	Go2UCSC	6.13	8.25	14.38	0.426287	3.86559	4.29333	7.09333	5.02667	8.10667	8	7.375	9.125	8.5
270	chr3_283_tRNAAsn_GTT+	n-Tn4	chr3	96125997	96126070	Go2UCSC	14.2067	0	14.2067	1	3.79857	13.1467	10.1333	9.38667	24.16	0	0	0	0
271	chr13_89_tRNALys_TTT+	n-Tk22	chr13	22063657	22063729	Go2UCSC	13.9733	0	13.9733	1	3.7462	11.4	7.56	18.0533	18.88	0	0	0	0
272	chr3_309_tRNAGln_CTG+	n-Tq2	chr3	97485382	97485453	Go2UCSC	12.7433	0	12.7433	1	3.42563	9.58667	13.7867	13.5733	14.0267	0	0	0	0
273	chr13_93_tRNAVal_AAC+	n-Tv4	chr13	23377270	23377342	Go2UCSC	10.4767	0	10.4767	1	3.37957	11.2267	3.02667	14.2933	13.36	0	0	0	0
274	chr13_969_tRNAIle_TAT_I-	n-Ti15	chr13	23362290	23362385	Go2UCSC	13.0333	0	13.0333	1	3.29125	17.1733	10.2267	15.0133	9.72	0	0	0	0
275	chr6_171_tRNACys_GCA+	n-Tc42	chr6	48221925	48221996	Go2UCSC	3.82	7.46702	11.287	0.338442	3.03415	6.8	2.37333	3.65333	2.45333	8.67611	4.27869	4.64111	12.2722
276	chr13_84_tRNAAsp_GTC+	n-Td11	chr13	22003182	22003253	Go2UCSC	11.2333	0	11.2333	1	3.01971	9.49333	4.05333	13.7067	17.68	0	0	0	0
277	chr13_960_tRNATyr_GTA_I-	n-Ty5	chr13	23518964	23519049	Go2UCSC	11.6467	0	11.6467	1	3.01727	10.12	3.04	16.2	17.2267	0	0	0	0
278	chr13_69_tRNAAla_AGC+	n-Ta18	chr13	21334439	21334510	Go2UCSC	11.1967	0	11.1967	1	3.00986	3.88	1.81333	29.32	9.77333	0	0	0	0
279	chr3_752_tRNAGly_CCC-	n-Tg6	chr3	96227956	96228026	Go2UCSC	11.0933	0	11.0933	1	2.99012	11.28	3.04	14.2667	15.7867	0	0	0	0
280	chr6_163_tRNACys_GCA+	n-Tc38	chr6	48104713	48104784	Go2UCSC	3.33	7.51396	10.844	0.307083	2.91504	1.06667	2.61333	4.05333	5.58667	8.80167	4.41313	6.31111	10.5299
281	chr3_878_tRNAGly_GCC-	n-Tg14	chr3	84032933	84033003	Go2UCSC	10.5933	0	10.5933	1	2.85535	7.41333	8.46667	15.52	10.9733	0	0	0	0
282	chr3_293_tRNAHis_GTG+	n-Th2	chr3	96239895	96239966	Go2UCSC	10.3533	0	10.3533	1	2.78315	17.1467	3.90667	10.0533	10.3067	0	0	0	0
283	chr6_164_tRNACys_GCA+	n-Tc39	chr6	48110178	48110249	Go2UCSC	2.69667	7.64521	10.3419	0.260752	2.78008	2.02667	2.66667	2.13333	3.96	8.80167	4.81313	6.31111	10.6549
284	chr8_887_tRNAGly_GCC-	n-Tg16	chr8	113154453	113154523	Go2UCSC	9.21	1.08333	10.2933	0.894754	2.77448	5.92	8.88	5.41333	16.6267	0.833333	1.5	1.33333	0.666667
285	chr13_100_tRNAIle_AAT+	n-Ti3	chr13	23488929	23489002	Go2UCSC	8.93667	1.25	10.1867	0.877291	2.72371	11.0133	3.16	15.1867	6.38667	0.5	1.5	1.5	1.5
286	chr6_1023_tRNACys_GCA-	n-Tc15	chr6	48203079	48203150	Go2UCSC	6.34333	3.75667	10.1	0.628053	2.71505	4.38667	6.26667	4.34667	10.3733	3.59667	1.32667	2.41667	7.68667
287	chr3_756_tRNAGln_CTG-	n-Tq5	chr3	96145079	96145150	Go2UCSC	8.76	1.125	9.885	0.886191	2.65726	10.3467	1.82667	11.4533	11.4133	0.5	0.5	1.5	2
288	chr11_69_tRNAAsp_GTC+	n-Td10	chr11	7769780	7769851	Go2UCSC	4.01333	5.50028	9.51362	0.421851	2.55742	2.46667	3.48	7.33333	2.77333	4.55802	4.90976	7.61069	4.92266
289	chr7_1276_tRNALys_TTT-	n-Tk24	chr7	29579007	29579079	Go2UCSC	9.04333	0.375	9.41833	0.960184	2.52502	11.7733	4.05333	9.2	11.1467	0	0	1	0.5
290	chr6_1009_tRNACys_GCA-	n-Tc22	chr6	48287090	48287161	Go2UCSC	8.61333	0.683826	9.29716	0.926448	2.49924	7.09333	8.88	10.8933	7.58667	0.513333	1.49091	0.0133333	0.717727
291	chr6_1006_tRNACys_GCA-	n-Tc20	chr6	48304018	48304089	Go2UCSC	7.46667	1.75577	9.22244	0.80962	2.47915	11.1467	3.14667	9.69333	5.88	2.49389	1.89535	0.333333	2.30051
292	chr6_1013_tRNACys_GCA-	n-Tc26	chr6	48259706	48259777	Go2UCSC	6.92667	1.93744	8.8641	0.781429	2.38282	5.06667	2.29333	12.3067	8.04	2.18056	0.935354	1.33333	3.30051
293	chr18_633_tRNAThr_CGT-	n-Tt10	chr18	46446083	46446154	Go2UCSC	8.58333	0	8.58333	1	2.30735	7.85333	5.61333	10.5867	10.28	0	0	0	0
294	chr13_964_tRNAVal_CAC-	n-Tv10	chr13	23503946	23504018	Go2UCSC	8.41	0	8.41	1	2.25469	9.04	5.17333	8.08	11.3467	0	0	0	0
295	chr11_238_tRNAAla_AGC+	n-Ta1	chr11	51790041	51790112	Go2UCSC	8.35	0	8.35	1	2.24462	8.18667	4.41333	6.64	14.16	0	0	0	0
296	chr13_83_tRNALys_TTT+	n-Tk23	chr13	21999809	21999881	Go2UCSC	7.83667	0.375	8.21167	0.954333	2.20152	8.85333	3.62667	10.7467	8.12	0	0	1	0.5
297	chr6_1019_tRNACys_GCA-	n-Tc28	chr6	48229770	48229841	Go2UCSC	5.33	2.80827	8.13827	0.65493	2.18771	3.04	7.12	6	5.16	3.64722	1.15202	1.65	4.78384
298	chr3_1_tRNALys_CTT+	n-Tk1	chr3	3123740	3123812	Go2UCSC	8.14667	0	8.14667	1	2.18409	6.52	8.81333	10.3467	6.90667	0	0	0	0
299	chr6_1016_tRNACys_GCA-	n-Tc27	chr6	48248949	48249020	Go2UCSC	3.58667	4.46952	8.05619	0.445206	2.16564	3.98667	4.05333	2.02667	4.28	5.76389	3.56869	3.26333	5.28217
300	chr6_162_tRNACys_GCA+	n-Tc13	chr6	48093355	48093426	Go2UCSC	4.53333	3.46778	8.00111	0.566588	2.15084	2.93333	2.02667	3.04	10.1333	3.81111	2.96	2.27333	4.82667
301	chr3_286_tRNAGlu_TTC+	n-Te19	chr3	96150598	96150669	Go2UCSC	0	7.71833	7.71833	0	2.07482	0	0	0	0	9.02667	5.34667	6.96	9.54
302	chr3_754_tRNAGlu_TTC-	n-Te20	chr3	96191328	96191399	Go2UCSC	0	7.71833	7.71833	0	2.07482	0	0	0	0	9.02667	5.34667	6.96	9.54
303	chr6_1012_tRNACys_GCA-	n-Tc25	chr6	48263017	48263088	Go2UCSC	7.29667	0.33327	7.62994	0.956321	2.05106	8.72	10.8667	6.66667	2.93333	0.222222	0.60202	0	0.508838
304	chr6_177_tRNACys_GCA+	n-Tc2	chr6	48266536	48266605	Go2UCSC	5.34667	2.23	7.57667	0.705675	2.04775	6.28	3.37333	7.68	4.05333	0.44	2.88	3.66667	1.93333
305	chr6_168_tRNACys_GCA+	n-Tc41	chr6	48147025	48147096	Go2UCSC	7.39	0.132576	7.52258	0.982376	2.0222	8.68	5.85333	7.86667	7.16	0	0.257576	0	0.272727
306	chr19_108_tRNAPhe_GAA+	n-Tf2	chr19	12083035	12083107	Go2UCSC	7.51	0	7.51	1	2.0134	5.54667	4.05333	8.92	11.52	0	0	0	0
307	chr6_1017_tRNACys_GCA-	n-Tc50	chr6	48243006	48243077	Go2UCSC	7.06333	0.375	7.43833	0.949585	1.99955	5.16	3.34667	11.3867	8.36	0	0	1	0.5
308	chr9_1514_tRNALys_CTT-	n-Tk4	chr9	14762877	14762949	Go2UCSC	7.40333	0	7.40333	1	1.98481	6.46667	6.34667	6.4	10.4	0	0	0	0
309	chr6_166_tRNACys_GCA+	n-Tc40	chr6	48114100	48114171	Go2UCSC	5.06667	2.18119	7.24785	0.699058	1.94835	4.82667	3.6	4.14667	7.69333	1.93056	2.36869	0.583333	3.84217
310	chr13_971_tRNAThr_AGT-	n-Tt1	chr13	22121969	22122042	Go2UCSC	7.28667	0	7.28667	1	1.94831	2.21333	4.02667	10.1067	12.8	0	0	0	0
311	chr3_2_tRNALys_CTT+	n-Tk9	chr3	3149493	3149565	Go2UCSC	7.21	0	7.21	1	1.93298	5.02667	5.92	2.86667	15.0267	0	0	0	0
312	chr1_730_tRNAArg_TCT+	n-Tr20	chr1	175320460	175320533	Go2UCSC	7.22667	0	7.22667	1	1.93226	10.6267	3.85333	5.97333	8.45333	0	0	0	0
313	chr10_979_tRNAAla_AGC-	n-Ta5	chr10	77846390	77846462	Go2UCSC	7.13333	0	7.13333	1	1.91242	4.50667	10.0667	5.53333	8.42667	0	0	0	0
314	chr6_1026_tRNACys_GCA-	n-Tc48	chr6	48174328	48174399	Go2UCSC	7.09	0	7.09	1	1.90591	1.53333	6.62667	9.76	10.44	0	0	0	0
315	chr6_179_tRNACys_GCA+	n-Tc14	chr6	48290612	48290683	Go2UCSC	4.62667	2.21333	6.84	0.676413	1.83871	3.94667	5.96	1.01333	7.58667	2.83333	1.14	2.84667	2.03333
316	chr16_76_tRNALys_CTT+	n-Tk3	chr16	16854357	16854429	Go2UCSC	6.38333	0	6.38333	1	1.71135	5.81333	4.2	5.28	10.24	0	0	0	0
317	chr15_876_tRNAMet_CAT-	n-Tm3	chr15	69227053	69227124	Go2UCSC	5.43667	0.900765	6.33743	0.857866	1.70361	6.69333	1.90667	7.09333	6.05333	0.99965	1.10758	0.229167	1.26667
318	chr10_1120_tRNAAla_AGC-	n-Ta6	chr10	61853872	61853944	Go2UCSC	6.26667	0	6.26667	1	1.68007	7.09333	4.28	8.30667	5.38667	0	0	0	0
319	chr15_1013_tRNAAsn_GTT-	n-Tn2	chr15	16205705	16205778	Go2UCSC	6.19	0	6.19	1	1.65508	4.30667	3.14667	8.10667	9.2	0	0	0	0
320	chr1_791_tRNASer_GCT+	n-Ts15	chr1	183986139	183986220	Go2UCSC	6.12667	0.124216	6.25088	0.980128	1.63636	7.10667	5.06667	5.06667	7.26667	0.176145	0.0844395	0.111912	0.124367
321	chr6_173_tRNACys_GCA+	n-Tc44	chr6	48247432	48247503	Go2UCSC	4.69667	1.33988	6.03655	0.778039	1.62273	3.69333	2.96	4.05333	8.08	1.8	0.25	1.04286	2.26667
322	chr8_886_tRNAGly_GCC-	n-Tg15	chr8	113155146	113155216	Go2UCSC	4.76333	1.08333	5.84667	0.814709	1.57592	6.37333	2.02667	7.61333	3.04	0.833333	1.5	1.33333	0.666667
323	chr6_1032_tRNACys_GCA-	n-Tc36	chr6	48094927	48094998	Go2UCSC	2.00667	3.82488	5.83155	0.344105	1.56762	0.48	1.70667	0.693333	5.14667	4.84	2.77	5.17619	2.51333
324	chr3_622_tRNAGlu_CTC-	n-Te1	chr3	123602105	123602176	Go2UCSC	5.73333	0	5.73333	1	1.54122	4.77333	8.01333	3.78667	6.36	0	0	0	0
325	chr9_592_tRNACys_GCA+	n-Tc47	chr9	104302450	104302521	Go2UCSC	5.70667	0	5.70667	1	1.53405	8.57333	5.52	5.50667	3.22667	0	0	0	0
326	chrX_321_tRNAArg_CCT+	n-Tr13	chrX	108490826	108490898	Go2UCSC	4.34	1.375	5.715	0.759405	1.53217	3.04	4.18667	4.05333	6.08	0.5	1	2	2
327	chr13_1041_tRNALys_CTT-	n-Tk6	chr13	4223394	4223466	Go2UCSC	5.24667	0.454444	5.70111	0.920288	1.52845	2.41333	4.29333	9.10667	5.17333	0.111111	0.531111	0.842222	0.333333
328	chr15_355_tRNAMet_CAT+	n-Tm4	chr15	88471962	88472034	Go2UCSC	5.60667	0	5.60667	1	1.50313	2.02667	3.04	6.49333	10.8667	0	0	0	0
329	chr6_1031_tRNACys_GCA-	n-Tc35	chr6	48106274	48106345	Go2UCSC	1.75	3.76821	5.51821	0.317132	1.48339	0.306667	1.01333	1.70667	3.97333	4.84	2.54333	5.17619	2.51333
330	chr6_176_tRNACys_GCA+	n-Tc9	chr6	48261498	48261569	Go2UCSC	4.22	1.205	5.425	0.77788	1.45833	4.05333	2.62667	6.18667	4.01333	1.53333	1.37	0.916667	1
331	chr6_1029_tRNACys_GCA-	n-Tc49	chr6	48159837	48159908	Go2UCSC	5.4	0	5.4	1	1.45161	4.88	4.32	8.49333	3.90667	0	0	0	0
332	chr6_172_tRNACys_GCA+	n-Tc43	chr6	48223679	48223750	Go2UCSC	2.90667	2.48	5.38667	0.539604	1.44803	0.133333	2.62667	1.54667	7.32	1.20667	2.58667	2.75333	3.37333
333	chr13_82_tRNAMet_CAT+	n-Tm2	chr13	21998980	21999051	Go2UCSC	5.29	0	5.29	1	1.42204	3.2	2.21333	7.38667	8.36	0	0	0	0
334	chr1_717_tRNAHis_ATG+	n-Th1	chr1	173599570	173599642	Go2UCSC	4.61	0.637722	5.24772	0.878476	1.4069	3.04	7.33333	7.68	0.386667	0.199652	0.927853	0.658443	0.76494
335	chr11_1752_tRNALys_CTT-	n-Tk5	chr11	73950817	73950889	Go2UCSC	5.24333	0	5.24333	1	1.40572	6.22667	2.02667	3.86667	8.85333	0	0	0	0
336	chr6_1021_tRNACys_GCA-	n-Tc29	chr6	48218457	48218528	Go2UCSC	2.76333	2.455	5.21833	0.529543	1.40278	3.92	2.4	1.69333	3.04	3.75	2.96667	2.10333	1
337	chr9_593_tRNACys_GCA+	n-Tc53	chr9	104306386	104306457	Go2UCSC	5.10667	0	5.10667	1	1.37276	3.05333	3.04	5.06667	9.26667	0	0	0	0
338	chr13_992_tRNASer_GCT-	n-Ts16	chr13	21584714	21584795	Go2UCSC	3.48667	1.75	5.23667	0.665818	1.37086	4.05333	2.02667	5.17333	2.69333	1.5	1.5	2	2
339	chr6_1005_tRNACys_GCA-	n-Tc19	chr6	48313531	48313602	Go2UCSC	1.99	3.105	5.095	0.390579	1.36962	3.08	1.01333	2.02667	1.84	1.70667	3.58667	3.25333	3.87333
340	chr6_1033_tRNACys_GCA-	n-Tc4	chr6	48090483	48090554	Go2UCSC	5.04667	0	5.04667	1	1.35663	5.81333	3.44	3.90667	7.02667	0	0	0	0
341	chr17_998_tRNAPro_TGG-	n-Tp11	chr17	23675733	23675804	Go2UCSC	4.98333	0	4.98333	1	1.33961	1.01333	5.17333	4.45333	9.29333	0	0	0	0
342	chr13_995_tRNAGln_TTG-	n-Tq13	chr13	21360338	21360409	Go2UCSC	4.94667	0	4.94667	1	1.32975	3.08	4.05333	4.05333	8.6	0	0	0	0
343	chr3_757_tRNAAsn_GTT-	n-Tn5	chr3	96138538	96138611	Go2UCSC	4.05333	0.685	4.73833	0.855434	1.29817	4.05333	1.01333	3.04	8.10667	1.04667	0	1.24667	0.446667
344	chr1_583_tRNAIle_TAT+	n-Ti13	chr1	155305794	155305866	Go2UCSC	4.83	0	4.83	1	1.29491	7.09333	6.77333	3.66667	1.78667	0	0	0	0
345	chr11_1132_tRNAMet_CAT-	n-Tm1	chr11	121825376	121825448	Go2UCSC	4.81333	0	4.81333	1	1.29044	2.02667	3.04	7.09333	7.09333	0	0	0	0
346	chr6_174_tRNACys_GCA+	n-Tc6	chr6	48252458	48252529	Go2UCSC	3.67333	1.125	4.79833	0.765544	1.28987	2.04	2.02667	3.53333	7.09333	0	2	1	1.5
347	chr3_749_tRNAHis_GTG-	n-Th11	chr3	96267895	96267966	Go2UCSC	4.76667	0	4.76667	1	1.28136	6.18667	2.69333	4.18667	6	0	0	0	0
348	chr11_1203_tRNAAla_AGC-	n-Ta3	chr11	116277293	116277365	Go2UCSC	4.71	0	4.71	1	1.26273	1.01333	2.97333	9.86667	4.98667	0	0	0	0
349	chr6_1027_tRNACys_GCA-	n-Tc33	chr6	48173093	48173164	Go2UCSC	4.52667	0	4.52667	1	1.21685	7.78667	2.02667	4.17333	4.12	0	0	0	0
350	chr6_167_tRNACys_GCA+	n-Tc8	chr6	48136317	48136388	Go2UCSC	4.52667	0	4.52667	1	1.21685	2.58667	2.57333	7.34667	5.6	0	0	0	0
351	chr8_168_tRNALeu_CAG+	n-Tl14	chr8	39276255	39276337	Go2UCSC	3.8	0.848412	4.64841	0.817484	1.21368	6.08	3.04	4.05333	2.02667	0.734214	0.583571	0.814869	1.26099
352	chr6_1015_tRNACys_GCA-	n-Tc7	chr6	48255463	48255534	Go2UCSC	4.48333	0	4.48333	1	1.2052	2.77333	3.53333	2.42667	9.2	0	0	0	0
353	chr13_983_tRNAMet_CAT-	n-Tm10	chr13	22023038	22023109	Go2UCSC	4.47667	0	4.47667	1	1.20341	5.05333	1.8	6.08	4.97333	0	0	0	0
354	chr6_161_tRNACys_GCA+	n-Tc37	chr6	48083936	48084007	Go2UCSC	3.64333	0.827381	4.47071	0.814933	1.2018	6.08	3.82667	1.45333	3.21333	0.5	1	1.30952	0.5
355	chr4_67_tRNAGly_CCC+	n-Tg3	chr4	32317225	32317295	Go2UCSC	4.30333	0.0833333	4.38667	0.981003	1.18239	6.52	1.44	1.73333	7.52	0	0.166667	0	0.166667
356	chr5_1609_tRNAAsp_GTC-	n-Td1	chr5	101421893	101421964	Go2UCSC	4.18667	0.15	4.33667	0.965411	1.16577	2.02667	6.97333	3.04	4.70667	0.4	0	0.2	0
357	chr6_1018_tRNACys_GCA-	n-Tc12	chr6	48238875	48238946	Go2UCSC	4.29	0	4.29	1	1.15323	2.02667	5.94667	6.50667	2.68	0	0	0	0
358	chr4_1183_tRNAVal_AAC-	n-Tv1	chr4	138986421	138986492	Go2UCSC	4.28	0	4.28	1	1.15054	2.77333	3.12	5.89333	5.33333	0	0	0	0
359	chr4_626_tRNAAla_CGC+	n-Ta22	chr4	131681174	131681245	Go2UCSC	4.27667	0.000206591	4.27687	0.999952	1.1497	5.06667	4.05333	2.92	5.06667	0.000701754	0	0.000124611	0
360	chr6_651_tRNAVal_GAC-	n-Tv20	chr6	135217793	135217866	Go2UCSC	4.07333	0.163246	4.23658	0.961467	1.13278	0.853333	3.94667	2.02667	9.46667	0.213317	0.0390237	0.129723	0.270922
361	chr3_282_tRNAGly_CCC+	n-Tg2	chr3	96115177	96115247	Go2UCSC	4.11	0	4.11	1	1.10782	2.02667	4.81333	4.36	5.24	0	0	0	0
362	chr11_832_tRNASer_GGA+	n-Ts23	chr11	100399472	100399544	Go2UCSC	4.12667	0	4.12667	1	1.10634	4.28	1.86667	5.89333	4.46667	0	0	0	0
363	chr17_392_tRNAVal_CAC+	n-Tv11	chr17	59208131	59208203	Go2UCSC	4.11333	0	4.11333	1	1.10277	3.49333	3.04	2.85333	7.06667	0	0	0	0
364	chr4_62_tRNAIle_AAT+	n-Ti2	chr4	27831926	27831999	Go2UCSC	4.05333	0	4.05333	1	1.08378	1.01333	5.06667	3.04	7.09333	0	0	0	0
365	chr16_267_tRNALys_CTT+	n-Tk2	chr16	47250659	47250731	Go2UCSC	4.04	0	4.04	1	1.08311	5.16	0.84	5.06667	5.09333	0	0	0	0
366	chr6_1020_tRNACys_GCA-	n-Tc3	chr6	48228791	48228862	Go2UCSC	3.84	0	3.84	1	1.03226	3.42667	1.98667	0.826667	9.12	0	0	0	0
367	chr6_1014_tRNACys_GCA-	n-Tc16	chr6	48258728	48258799	Go2UCSC	3.30667	0.531667	3.83833	0.861485	1.03181	2.58667	2.96	6.66667	1.01333	1.54	0.186667	0.4	0
368	chr13_951_tRNAArg_ACG-	n-Tr4	chr13	23592391	23592463	Go2UCSC	3.79667	0	3.79667	1	1.01787	3.12	2.02667	5.06667	4.97333	0	0	0	0
369	chr6_181_tRNACys_GCA+	n-Tc46	chr6	48305854	48305925	Go2UCSC	1.44667	2.26321	3.70988	0.38995	0.99728	0.0933333	0.253333	2.4	3.04	2.38667	1.02667	3.04619	2.59333
370	chr6_1011_tRNACys_GCA-	n-Tc24	chr6	48282839	48282910	Go2UCSC	3.61	0.0933333	3.70333	0.974797	0.99552	3.04	4.05333	2.30667	5.04	0	0.333333	0	0.04
371	chr6_1022_tRNACys_GCA-	n-Tc30	chr6	48211721	48211792	Go2UCSC	3.63667	0	3.63667	1	0.977599	4.38667	2.52	5.36	2.28	0	0	0	0
372	chr4_645_tRNAAla_AGC+	n-Ta8	chr4	132071923	132071994	Go2UCSC	3.43	0.182706	3.61271	0.949427	0.971158	3.04	2.02667	4.81333	3.84	0.1527	0.167961	0.228274	0.181889
373	chr6_178_tRNACys_GCA+	n-Tc45	chr6	48267514	48267585	Go2UCSC	2.28	1.28071	3.56071	0.640321	0.957181	2.93333	1.30667	3.04	1.84	2.09333	0.5	1.64286	0.886667
374	chr6_1024_tRNACys_GCA-	n-Tc31	chr6	48202102	48202173	Go2UCSC	3.49333	0.0357143	3.52905	0.98988	0.948669	4.82667	0	4.21333	4.93333	0	0	0.142857	0
375	chr16_315_tRNAIle_AAT+	n-Ti1	chr16	75434424	75434497	Go2UCSC	3.54667	0	3.54667	1	0.948307	2.02667	6.08	2.02667	4.05333	0	0	0	0
376	chr8_317_tRNALys_TTT+	n-Tk20	chr8	82433177	82433249	Go2UCSC	3.45	0	3.45	1	0.924933	0.666667	3.54667	2.85333	6.73333	0	0	0	0
377	chr1_284_tRNAPro_AGG+	n-Tp1	chr1	78294370	78294441	Go2UCSC	3.41667	0	3.41667	1	0.918459	5.84	2.17333	3.04	2.61333	0	0	0	0
378	chr1_1268_tRNALys_CTT-	n-Tk7	chr1	112801324	112801396	Go2UCSC	2.95667	0.433333	3.39	0.872173	0.908847	2.02667	1.6	3.04	5.16	0.2	0.5	0.7	0.333333
379	chr5_13_tRNASeC_TCA+	n-Ts1	chr5	5627681	5627751	Go2UCSC	3.04	0.322685	3.36269	0.904039	0.906384	3.04	3.04	2.02667	4.05333	0.859715	0.155406	0.132922	0.142698
380	chr6_175_tRNACys_GCA+	n-Tc17	chr6	48253464	48253535	Go2UCSC	2.1	1.20333	3.30333	0.635721	0.887993	1.04	1.01333	0.36	5.98667	1.92667	0.5	1.5	0.886667
381	chr7_967_tRNAGlu_CTC-	n-Te3	chr7	106692410	106692481	Go2UCSC	3.29333	0	3.29333	1	0.885305	2.28	3.04	2.78667	5.06667	0	0	0	0
382	chr6_1025_tRNACys_GCA-	n-Tc32	chr6	48194315	48194386	Go2UCSC	2.18	1.01958	3.19958	0.681339	0.860103	3.14667	1.50667	2.02667	2.04	1.5	0.973333	0.98	0.625
383	chr10_885_tRNALys_TTT-	n-Tk21	chr10	87292631	87292703	Go2UCSC	3.17667	0	3.17667	1	0.851653	3.04	5.82667	2.82667	1.01333	0	0	0	0
384	chr5_1135_tRNASer_AGA_I-	n-Ts11	chr5	144108745	144108871	Go2UCSC	3.01	0.607862	3.61786	0.831983	0.847274	3.04	4.05333	3.04	1.90667	0.0810676	1.22648	0.874727	0.249172
385	chr6_182_tRNACys_GCA+	n-Tc11	chr6	48306850	48306921	Go2UCSC	3.12333	0	3.12333	1	0.839606	4.38667	3.04	3.04	2.02667	0	0	0	0
386	chr11_372_tRNAPro_TGG+	n-Tp12	chr11	67104641	67104712	Go2UCSC	3.07667	0	3.07667	1	0.827061	2.96	1.01333	2.02667	6.30667	0	0	0	0
387	chrX_643_tRNALys_CTT-	n-Tk19	chrX	132730271	132730343	Go2UCSC	3.07	0	3.07	1	0.823056	3.94667	2.30667	2.02667	4	0	0	0	0
388	chrX_368_tRNAAla_TGC+	n-Ta36	chrX	132931443	132931514	Go2UCSC	2.17667	0.833333	3.01	0.723145	0.80914	3.66667	1.01333	3.04	0.986667	1	0.5	0.833333	1
389	chr3_285_tRNAAsn_GTT+	n-Tn1	chr3	96138894	96138967	Go2UCSC	2	0.94	2.94	0.680272	0.805479	2.02667	0.906667	5.06667	0	1.95333	0	1.25333	0.553333
390	chr6_1010_tRNACys_GCA-	n-Tc23	chr6	48286107	48286178	Go2UCSC	2.31333	0.591111	2.90444	0.79648	0.780765	0.72	1.69333	4.81333	2.02667	1.58667	0.366667	0.411111	0
391	chr6_1034_tRNACys_GCA-	n-Tc10	chr6	48089509	48089580	Go2UCSC	2.89	0	2.89	1	0.776882	3.04	0	8.52	0	0	0	0	0
392	chr13_73_tRNAThr_TGT+	n-Tt18	chr13	21367825	21367898	Go2UCSC	2.85667	0	2.85667	1	0.763815	1.01333	3.04	4.05333	3.32	0	0	0	0
393	chr6_170_tRNACys_GCA+	n-Tc1	chr6	48155067	48155138	Go2UCSC	2.82333	0	2.82333	1	0.758961	2.09333	1.13333	4.05333	4.01333	0	0	0	0
394	chr6_1030_tRNACys_GCA-	n-Tc34	chr6	48157450	48157521	Go2UCSC	2.77333	0.03125	2.80458	0.988858	0.75392	4.04	0.96	2.04	4.05333	0	0	0	0.125
395	chr2_1506_tRNAIle_GAT-	n-Ti12	chr2	118881889	118881962	Go2UCSC	2.81	0.00193137	2.81193	0.999313	0.751853	1.01333	0	3.70667	6.52	0.00188513	0.00174927	0.00253616	0.00155491
396	chrX_372_tRNAAla_TGC+	n-Ta37	chrX	133103785	133103856	Go2UCSC	2.56	0.205	2.765	0.925859	0.74328	0	3.04	3.04	4.16	0.22	0	0.333333	0.266667
397	chr3_928_tRNAVal_CAC-	n-Tv9	chr3	59278848	59278919	Go2UCSC	2.65333	0	2.65333	1	0.713262	0	1.01333	7.09333	2.50667	0	0	0	0
398	chr6_1008_tRNACys_GCA-	n-Tc21	chr6	48299761	48299832	Go2UCSC	2.57333	0.0683333	2.64167	0.974132	0.710125	1.85333	4.96	3.48	0	0	0.273333	0	0
399	chr11_630_tRNAGln_TTG+	n-Tq12	chr11	86075670	86075741	Go2UCSC	2.47333	0.125	2.59833	0.951892	0.698477	6.21333	2.66667	1.01333	0	0.166667	0	0.166667	0.166667
400	chrX_366_tRNAAla_TGC+	n-Ta35	chrX	132915286	132915357	Go2UCSC	1.74	0.833333	2.57333	0.676166	0.691756	0.786667	3.36	1.8	1.01333	1	0.5	0.833333	1
401	chr13_79_tRNASup_TTA+	n-Tsta1	chr13	21887668	21887750	Go2UCSC	2.42667	0.176667	2.60333	0.932138	0.679721	5.08	1.01333	2.6	1.01333	0	0	0.213333	0.493333
402	chrX_159_tRNAAla_AGC+	n-Ta2	chrX	53840716	53840788	Go2UCSC	2.47	0	2.47	1	0.662198	3.81333	2.37333	2.96	0.733333	0	0	0	0
403	chr6_180_tRNACys_GCA+	n-Tc5	chr6	48291587	48291658	Go2UCSC	2.33333	0.0182738	2.35161	0.992229	0.632152	2.02667	1.33333	1.01333	4.96	0	0.0730952	0	0
404	chr10_1282_tRNATrp_CCA-	n-Tw1	chr10	23496889	23496960	Go2UCSC	1.81333	0.466362	2.2797	0.795428	0.612821	1.01333	2.02667	2.02667	2.18667	0.363278	0.361447	0.500909	0.639814
405	chr2_510_tRNAAsp_GTC+	n-Td2	chr2	113929103	113929174	Go2UCSC	2.25	0	2.25	1	0.604839	3.04	1.01333	4.22667	0.72	0	0	0	0
406	chr6_10_tRNAVal_CAC+	n-Tv13	chr6	10050371	10050443	Go2UCSC	2.23	0	2.23	1	0.597855	2.02667	1.01333	1.82667	4.05333	0	0	0	0
407	chr16_4_tRNALeu_AAG+	n-Tl1	chr16	3449838	3449909	Go2UCSC	0.613333	1.52	2.13333	0.2875	0.573477	0	0.386667	0.04	2.02667	1.33333	0.666667	1.74667	2.33333
408	chr14_628_tRNAThr_AGT-	n-Tt2	chr14	59436990	59437063	Go2UCSC	2.12667	0	2.12667	1	0.568627	1.01333	3.13333	1.32	3.04	0	0	0	0
409	chr1_814_tRNAAsn_GTT+	n-Tn3	chr1	190765285	190765358	Go2UCSC	1.73667	0.346289	2.08296	0.833751	0.55694	2.02667	3.04	1.01333	0.866667	0.520548	0.326194	0.215746	0.322669
410	chr5_1627_tRNALys_CTT-	n-Tk8	chr5	98470109	98470181	Go2UCSC	2.02667	0	2.02667	1	0.543342	3.04	0	3.04	2.02667	0	0	0	0
411	chr4_1314_tRNAGly_GCC-	n-Tg9	chr4	132670411	132670481	Go2UCSC	1.88667	0.104167	1.99083	0.947677	0.536613	1.4	4.12	2.02667	0	0	0	0.25	0.166667
412	chrX_364_tRNAAla_CGC+	n-Ta23	chrX	132902260	132902331	Go2UCSC	1.18333	0.805	1.98833	0.595138	0.534498	1.09333	2.02667	1.61333	0	0.986667	1.33333	0.4	0.5
413	chr13_959_tRNATyr_GTA_I-	n-Ty6	chr13	23520607	23520695	Go2UCSC	2.04667	0	2.04667	1	0.526135	2.53333	1.56	2.25333	1.84	0	0	0	0
414	chrX_931_tRNAPro_TGG-	n-Tp13	chrX	14279742	14279813	Go2UCSC	1.01333	0.942889	1.95622	0.518005	0.525866	0	3.04	0	1.01333	1.21333	0.431111	1.06267	1.06444
415	chr17_720_tRNAGlu_CTC-	n-Te4	chr17	56231424	56231495	Go2UCSC	1.09333	0.843978	1.93731	0.564356	0.520782	0	1.01333	2.02667	1.33333	0.964873	0.944996	0.609832	0.856208
416	chrX_640_tRNAAla_CGC-	n-Ta26	chrX	132913905	132913976	Go2UCSC	0	1.8575	1.8575	0	0.499328	0	0	0	0	2.48	2.19333	1.42333	1.33333
417	chrX_639_tRNAAla_CGC-	n-Ta25	chrX	132930061	132930132	Go2UCSC	0	1.8575	1.8575	0	0.499328	0	0	0	0	2.48	2.19333	1.42333	1.33333
418	chr10_1101_tRNAMet_CAT_I-	n-Tm18	chr10	62656988	62657080	Go2UCSC	1.63333	0.251111	1.88444	0.866745	0.479502	2.02667	1.46667	0	3.04	0.556249	0.0755932	0.0423718	0.330231
419	chr12_886_tRNAGlu_CTC-	n-Te2	chr12	43516062	43516133	Go2UCSC	1.53	0.247338	1.77734	0.860838	0.477779	1.05333	1.01333	2.02667	2.02667	0.1	0.301	0.279111	0.309242
420	chr3_1026_tRNALeu_CAG-	n-Tl13	chr3	24061947	24062029	Go2UCSC	1.82667	0	1.82667	1	0.476936	0	3.04	1.41333	2.85333	0	0	0	0
421	chrX_363_tRNAAla_TGC+	n-Ta31	chrX	132892141	132892212	Go2UCSC	1.77333	0	1.77333	1	0.476703	0	0	3.04	4.05333	0	0	0	0
422	chr16_829_tRNALeu_AAG-	n-Tl2	chr16	3012009	3012080	Go2UCSC	0	1.6	1.6	0	0.430108	0	0	0	0	1.33333	0.666667	2	2.4
423	chr19_2_tRNALeu_AAG+	n-Tl3	chr19	3066556	3066627	Go2UCSC	0	1.6	1.6	0	0.430108	0	0	0	0	1.33333	0.666667	2	2.4
424	chrX_371_tRNAAla_TGC+	n-Ta32	chrX	133088264	133088335	Go2UCSC	0	1.52833	1.52833	0	0.410842	0	0	0	0	0.613333	0.5	3.5	1.5
425	chrX_637_tRNAAla_TGC-	n-Ta33	chrX	132964904	132964975	Go2UCSC	0	1.52833	1.52833	0	0.410842	0	0	0	0	0.613333	0.5	3.5	1.5
426	chrX_462_tRNALeu_TAA+	n-Tl23	chrX	157573066	157573148	Go2UCSC	0.91	0.278023	1.18802	0.765979	0.310189	0	0.786667	2.02667	0.826667	0.146254	0.395305	0.197282	0.373251
427	chrX_369_tRNAAla_CGC+	n-Ta24	chrX	132936407	132936478	Go2UCSC	0	1.0625	1.0625	0	0.285618	0	0	0	0	0.833333	1.83333	0.25	1.33333
428	chrX_493_tRNASer_AGA-	n-Ts3	chrX	163347665	163347746	Go2UCSC	1.01333	0	1.01333	1	0.265271	4.05333	0	0	0	0	0	0	0
429	chrX_373_tRNAAla_CGC+	n-Ta20	chrX	133104302	133104374	Go2UCSC	0.253333	0.72	0.973333	0.260274	0.260947	0	0	0	1.01333	0.98	1	0.4	0.5
430	chrX_636_tRNAAla_CGC-	n-Ta21	chrX	133102404	133102475	Go2UCSC	0.403333	0.5025	0.905833	0.445262	0.243504	0	1.01333	0.6	0	0.833333	0.526667	0.65	0
431	chrX_375_tRNAAla_TGC+	n-Ta30	chrX	133124904	133124975	Go2UCSC	0.82	0	0.82	1	0.22043	1.01333	1.16	1.01333	0.0933333	0	0	0	0
432	chrX_936_tRNAGln_TTG-	n-Tq11	chrX	13436292	13436363	Go2UCSC	0.616667	0.155374	0.772041	0.798749	0.207538	0.44	0	1.01333	1.01333	0.19707	0.108765	0.116329	0.199332
433	chr9_1100_tRNAAla_AGC-	n-Ta4	chr9	74956737	74956819	Go2UCSC	0.403333	0	0.403333	1	0.105309	0	0.6	0	1.01333	0	0	0	0
Table S1. All annotated mouse tRNA genes are listed together with their chromosomal location, a link to the UCSC genome browser, and the tag scores for the anti-POLR3A and anti-POLR3D immunoprecipitations as indicated on top of the columns. The genes are listed in order of decreasing total tag density scores (column 11). The genes with total tag density of less than 5 (column 11) were considered …
